1 **Plexins Promote Hedgehog Signaling Through Their Cytoplasmic GAP Activity**

2

3 Justine M. Pinsky<sup>1\*</sup>, Tyler M. Hoard<sup>1\*</sup>, Xiao-Feng Zhao<sup>1</sup>, Nicole E. Franks<sup>1</sup>, Zoë C.

4 Frank<sup>1</sup>, Alexandra N. McMellen<sup>1</sup>, Roman J. Giger<sup>1,2</sup>, and Benjamin L. Allen<sup>1</sup>

5

6 <sup>1</sup>Department of Cell and Developmental Biology, <sup>2</sup>Department of Neurology, University

7 of Michigan, Ann Arbor, MI. 48109, USA

8 \* These authors contributed equally.

9 Correspondence: Benjamin L. Allen, [benallen@umich.edu](mailto:benallen@umich.edu)

10

11 Running Title: Plexins Promote Hedgehog Signaling

12

13 **Abstract**

14 Hedgehog signaling controls tissue patterning during embryonic and postnatal  
15 development and continues to play important roles throughout life. Characterizing the full  
16 complement of Hedgehog pathway components is essential to understanding its wide-  
17 ranging functions. Previous work has identified Neuropilins, established Semaphorin  
18 receptors, as positive regulators of Hedgehog signaling. Neuropilins require Plexin co-  
19 receptors to mediate Semaphorin signaling, but a role for Plexins in Hedgehog signaling  
20 has not yet been explored. Here, we provide evidence that multiple Plexins promote  
21 Hedgehog signaling in NIH/3T3 fibroblasts and that Plexin loss-of-function in these cells  
22 results in significantly reduced Hedgehog pathway activity. Catalytic activity of the  
23 Plexin GTPase activating protein (GAP) domain is required for Hedgehog signal  
24 promotion, and constitutive activation of the GAP domain further amplifies Hedgehog  
25 signaling. Additionally, we demonstrate that Plexins promote Hedgehog signaling at the  
26 level of GLI transcription factors and that this promotion requires intact primary cilia.  
27 Finally, we find that Plexin loss-of-function significantly reduces the response to  
28 Hedgehog $\alpha$  pathway activation in the mouse dentate gyrus. Together, these data identify  
29 Plexins as novel components of the Hedgehog pathway and provide insight into their  
30 mechanism of action.

31

32

### 33 **Introduction**

34           The Hedgehog (HH) signaling pathway utilizes a core set of components to  
35 coordinate diverse cellular processes. In the absence of HH ligand, the twelve-pass  
36 transmembrane protein Patched 1 (PTCH1) inhibits pathway activity by repressing a  
37 second cell-surface protein Smoothed (SMO), a seven-pass transmembrane protein  
38 with GPCR-like activity (Alcedo et al. 1996; Marigo and Tabin 1996; Stone et al. 1996;  
39 van den Heuvel and Ingham 1996). HH ligand binding to PTCH1 leads to de-repression  
40 of SMO, which shifts the processing of GLI transcription factors from repressor to  
41 activator forms, thus altering the balance of HH target gene expression (Hui and Angers  
42 2011). By balancing the activity of these key molecules, HH signaling directs embryonic  
43 and postnatal development as well as adult tissue homeostasis in a wide variety of  
44 cellular contexts. In contrast, HH pathway disruption can drive a number of diseases,  
45 including cancer (Teglund and Toftgard 2010; Briscoe and Therond 2013; Petrova and  
46 Joyner 2014).

47           Beyond these core pathway components, a growing list of additional proteins  
48 regulate HH signaling at the cell surface in a tissue- and stage-specific manner (Beachy et  
49 al. 2010). Some examples include growth arrest-specific 1 (GAS1); CAM-  
50 related/downregulated by oncogenes (CDON); brother of CDON (BOC); PTCH1  
51 homolog Patched 2 (PTCH2); Hedgehog interacting protein (HHIP); Dispatched (DISP);  
52 Signal peptide, CUB domain, EGF-like 2 (Scube2); G-protein-coupled-receptor 161  
53 (GPR161); glypicans (GPCs); and low-density lipoprotein receptor-related 2 (LRP2)  
54 (Burke et al. 1999; Caspary et al. 2002; Kawakami et al. 2002; Ma et al. 2002; Jeong and  
55 McMahon 2005; Kawakami et al. 2005; Woods and Talbot 2005; Hollway et al. 2006;

56 Vyas et al. 2008; Yan and Lin 2008; Christ et al. 2012; Creanga et al. 2012; Tukachinsky  
57 et al. 2012; Mukhopadhyay et al. 2013; Bandari et al. 2015; Christ et al. 2015). Notably,  
58 many of these components act redundantly to mediate HH signal transduction (Zhang et  
59 al. 2001; Jeong and McMahon 2005; Allen et al. 2007; Allen et al. 2011; Izzi et al. 2011;  
60 Holtz et al. 2013). As a result, previous genetic screens may have missed additional  
61 regulators of the HH pathway due to their redundant nature. Furthermore, gene  
62 duplication events and increased complexity within vertebrate HH signaling, including a  
63 requirement for the primary cilium, have made it difficult to study HH regulators that  
64 lack invertebrate counterparts, such as Scube2 and GAS1. Therefore, our overall  
65 understanding of HH regulation remains incomplete.

66         The Semaphorins (SEMA) are a large family of membrane-bound and secreted  
67 proteins that regulate cell migration, axon guidance, synapse assembly, angiogenesis,  
68 immune function, and cell death (Yazdani and Terman 2006; Jongbloets and Pasterkamp  
69 2014; Koropouli and Kolodkin 2014; Fard and Tamagnone 2021). NRPs directly interact  
70 with class 3 SEMA ligands and require Plexin (PLXN) co-receptors to transduce SEMA  
71 signals intracellularly (Chen et al. 1997; He and Tessier-Lavigne 1997; Kolodkin et al.  
72 1997; Takahashi et al. 1999; Tamagnone et al. 1999; Gu et al. 2005). Membrane-bound  
73 SEMA and Sema3E interact directly with PLXN extracellular domains to activate  
74 downstream signaling events, which lead to remodeling and disassembly of the  
75 cytoskeleton (Barberis et al. 2004; Neufeld and Kessler 2008; Jongbloets and Pasterkamp  
76 2014; Rich et al. 2021). PLXNs are a family of conserved, single-pass transmembrane  
77 proteins containing nine different receptor types, which fall into four subfamilies based  
78 on homology (A, B, C, and D) (Tamagnone et al. 1999). The cytoplasmic domain of all

79 PLXN family members harbors a GTPase activating protein (GAP) domain (Rohm et al.  
80 2000b; Wang et al. 2012). Catalytic activity of the PLXN GAP domain is necessary for  
81 SEMA mediated cytoskeletal remodeling and cell migration (Hota and Buck 2012; Wang  
82 et al. 2013; Zhao et al. 2018). Importantly, there is a mechanistic link between HH and  
83 NRPs. Multiple lines of evidence show that NRPs positively regulate HH signaling  
84 through their cytoplasmic domains (Ge et al., 2015; Hillman et al., 2011; Pinsky et al.,  
85 2017); however, a role for PLXNs in HH signaling remains unexplored.

86 Here, we investigated a role for PLXNs in HH pathway regulation. Our data  
87 suggest that multiple PLXNs, including members of the PLXN A and B subfamilies,  
88 positively regulate HH signaling. Similar to NRPs, we find that the PLXN cytoplasmic  
89 domain is necessary for HH regulation. Interestingly, while the mechanism of NRP action  
90 in HH signaling may diverge from its mechanism in SEMA signaling (Andreyeva et al.  
91 2011; Ge et al. 2015; Pinsky et al. 2017), we discover that PLXNs function similarly in  
92 SEMA and HH cascades. Mutating key residues within the cytoplasmic PLXN GAP  
93 domain prevents PLXN from promoting HH signaling. Further, deleting the PLXN  
94 extracellular domain to create a constitutively active receptor augments HH promotion  
95 and alters HH-dependent tissue patterning and cell migration in the embryonic chicken  
96 neural tube, suggesting that PLXNs positively regulate HH signaling through GAP  
97 enzymatic activity. Additionally, we determine that PLXNs act at the level of the GLI  
98 transcription factors, and that PLXNs require intact primary cilia to promote HH pathway  
99 activity. In the developing mouse hippocampus, we observe PLXN dependent regulation  
100 of HH target gene expression in the dentate gyrus, *in vivo*. Taken together, these data

101 identify PLXNs as novel components of the HH pathway and contribute to our  
102 mechanistic understanding of HH regulation at the cell surface.

103

## 104 **Results**

### 105 *Multiple Plxns promote HH signaling in NIH/3T3 fibroblasts*

106 PLXNs consist of nine members that can be classified into four different  
107 subfamilies based on homology (PLXNA1-4, PLXNB1-3, PLXNC1, and PLXND1)  
108 (Tamagnone et al. 1999; Neufeld and Kessler 2008). PLXNs from the A and D  
109 subfamilies interact with NRP co-receptors (Takahashi et al. 1999; Neufeld and Kessler  
110 2008), which have been previously identified as positive regulators of HH signaling  
111 (Hillman et al. 2011; Ge et al. 2015; Pinsky et al. 2017). We initially investigated  
112 whether *Plxna1* expression in HH-responsive NIH/3T3 fibroblasts would impact HH  
113 signaling using a luciferase reporter assay ((Nybakken et al. 2005); Figure 1A).  
114 Strikingly, and similar to what we previously observed with *Nrp1* (Pinsky et al. 2017),  
115 *Plxna1* expression significantly increases HH pathway activation compared to a vector-  
116 transfected control (Figure 1B). Of note, PLXNA1 does not promote HH signaling in the  
117 absence of pathway activation with HH ligand (Figure 1B). To address whether HH  
118 promotion was specific to PLXNA1, we also examined PLXNA2, PLXNA3, and  
119 PLXNA4. Our data suggest that all members of the PLXN A subfamily promote HH  
120 signaling following pathway activation with HH ligand (Figure 1C-E). We extended our  
121 analyses to include PLXNB2, which is not known to interact with NRPs (Neufeld and  
122 Kessler 2008). Surprisingly, PLXNB2 also promotes HH signaling to a similar extent as  
123 PLXNs from the A subfamily, suggesting that PLXN-mediated HH promotion may be

124 independent of NRP interaction (Figure 1F-G). Importantly, GFR $\alpha$ 1, an unrelated cell-  
125 surface protein within the glial cell line-derived neurotrophic factor receptor (GFR)  
126 family, does not promote HH signaling (Figure 1G). Taken together, these data suggest  
127 that multiple PLXN family members promote HH signaling in NIH/3T3 cells.

128

129 *Plxn knockdown decreases HH-responsiveness in NIH/3T3 fibroblasts*

130         According to RNA sequencing data from the ENCODE project (Consortium  
131 2012; Davis et al. 2018), NIH/3T3 fibroblasts express a subset of Plxns at varying levels,  
132 with *Plxna1* and *Plxnb2* most highly expressed, followed by *Plxnd1*, *Plxna3*, and *Plxna2*  
133 (Figure S1). To address the effect of endogenous PLXNs on HH signaling in NIH/3T3  
134 cells, we generated two different *Plxna1*<sup>-/-</sup>;*Plxna2*<sup>-/-</sup> mouse embryonic fibroblast lines  
135 from embryonic day (E) 14.5 mouse embryos (Todaro and Green 1963). We then used  
136 quantitative, real-time polymerase chain reaction (RT-qPCR) to analyze HH target gene  
137 expression in fibroblasts treated with a SMO agonist (SAG; Figure 1H-I). In each  
138 experiment, we used BLOCK-iT™ fluorescent oligos to visually confirm transfection,  
139 and we compared each result to an internal BLOCK-iT™ transfected control (Figure 1H-  
140 I). Therefore, fold changes in expression are relative within each experiment and should  
141 not be compared across panels. Interestingly, both cell lines lacking *Plxna1* and *Plxna2*  
142 still respond to SAG activation of HH signaling, as measured by expression of the direct  
143 HH transcriptional targets, *Gli1* and *Ptch1* (Figure 1H-I). We hypothesized that this was  
144 likely due to the presence of other Plxn family members, which could compensate for the  
145 lack of PLXNA1 and PLXNA2.

146 To address the potential functional redundancy of other Plxn family members, we  
147 used siRNA reagents to reduce levels of *PlxnB2*, *PlxnA3*, and *PlxnD1* in *Plxna1<sup>-/-</sup>;Plxna2<sup>-/-</sup>*  
148 *l<sup>-/-</sup>* cells. Strikingly, both cell lines treated with the *Plxn* siRNAs listed above showed  
149 significantly reduced responses to SAG activation of *Gli1* and *Ptch1* compared to  
150 BLOCK-iT™ controls (Figure 1H-I). The degree of reduction following *Plxn* depletion is  
151 similar to that observed with *Nrp* depletion using previously published siRNA reagents  
152 targeting *Nrp1* and *Nrp2* (Hillman et al. 2011) (Figure 1H-I). Together, these data suggest  
153 that, like NRPs, PLXNs are required for HH signal transduction in NIH/3T3 fibroblasts.

154

155 *The PLXNA1 transmembrane and cytoplasmic domains are necessary for HH signal*  
156 *promotion*

157 PLXNs are single-pass transmembrane proteins containing an extracellular  
158 domain (ECD) that can interact with NRPs and SEMA ligands, a transmembrane (TM)  
159 domain that mediates dimerization, and a cytoplasmic domain (CD) through which  
160 PLXNs signal intracellularly (Neufeld and Kessler 2008). While many HH regulators at  
161 the cell surface bind to HH ligands through their ECD (Lee et al. 2001; Tenzen et al.  
162 2006; Capurro et al. 2008; Chang et al. 2011; Izzi et al. 2011; Christ et al. 2012; Whalen  
163 et al. 2013), NRP1 acts through its CD to regulate HH signaling (Ge et al. 2015; Pinsky  
164 et al. 2017). To investigate the mechanism of PLXN action in HH signaling, we first  
165 asked whether the PLXN CD is required for HH promotion. Interestingly, deleting the  
166 PLXNA1 TM and CD (PLXNA1<sup>ΔTMCD</sup>) or the CD alone (PLXNA1<sup>ΔCD</sup>) abrogates  
167 PLXNA1-mediated promotion of HH signaling in NIH/3T3 cells (Figure 2A-B). Western  
168 blot analyses confirmed PLXNA1, PLXNA1<sup>ΔTMCD</sup>, and PLXNA1<sup>ΔCD</sup> expression and



169 PLXNA1<sup>ΔTMCD</sup> secretion (Figure 2C). Further, immunofluorescence staining for an  
170 extracellular MYC epitope under permeabilizing and non-permeabilizing conditions  
171 confirmed the cell surface localization of PLXNA1 and PLXNA1<sup>ΔCD</sup> as well as the  
172 secretion of PLXNA1<sup>ΔTMCD</sup>, as compared to a control BOC construct with a C-terminal  
173 MYC tag (Figure 2D-K). These results suggest that the PLXNA1 TM and CD are  
174 required for promotion of HH signaling.

175

### 176 *PLXN cytoplasmic GAP activity mediates HH signal promotion*

177       Upon binding to the PLXN extracellular SEMA domain, SEMA ligand triggers a  
178 conformational change, releasing PLXN autoinhibition and allowing for the full  
179 activation of the intracellular GAP (Takahashi and Strittmatter 2001; Janssen et al. 2010;  
180 Nogi et al. 2010). As a result, deleting the autoinhibitory PLXN ECD results in  
181 constitutively GAP activity that induces robust cytoskeletal collapse through downstream  
182 signaling events (Takahashi and Strittmatter 2001; Hota and Buck 2012). To further test  
183 whether PLXN GAP function regulates HH signaling, we deleted the PLXNA1 ECD  
184 (PLXNA1<sup>ΔECD</sup>) and measured HH-dependent luciferase reporter activity in NIH/3T3 cells  
185 (Figure 3A). Not only is PLXNA1<sup>ΔECD</sup> still able to promote HH signaling, but the  
186 constitutively active PLXN GAP domain significantly augments the level of HH  
187 promotion (Figure 3B). While full-length PLXN boosts HH signaling one and a half to  
188 two-fold on average, PLXNA1<sup>ΔECD</sup> consistently increases the level of HH signaling  
189 between four- and ten-fold, averaging an approximately six-fold increase (Figure S2A).

190       The PLXN CD is essential for intracellular SEMA signal transduction, acting  
191 through a split GAP domain to induce cytoskeletal collapse (Puschel 2007; Neufeld and

192 Kessler 2008; Duan et al. 2014). Arginine to alanine mutations in residues 1429 and 1430  
193 of mouse PLXNA1 disrupt GAP activity, rendering PLXNA1 a nonfunctional SEMA  
194 receptor in a COS7 cell collapse assay (Rohm et al. 2000a). Strikingly, recapitulating  
195 these conserved arginine mutations within the PLXNA1 GAP domain also rendered  
196 PLXNA1 unable to promote HH signaling (PLXNA1R1; Figure 3C). Importantly,  
197 analogous mutations in PLXNB2 also abrogate the promotion of HH pathway activity  
198 (PLXNB2R1; Figure S2B-C). Further, the A1R1 arginine to alanine GAP mutations in  
199 the context of the PLXNA1 ECD deletion significantly reduces the level of HH  
200 promotion, though it does not completely abrogate PLXN-mediated HH pathway  
201 induction when compared with PLXNA1<sup>ΔCD</sup> (Figure 3D). Immunofluorescence analyses  
202 indicated appropriate localization of these constructs to the cell surface, compared to a C-  
203 terminally tagged BOC control, as well as cytoskeletal collapse in PLXNA1<sup>ΔECD</sup> and to  
204 some extent PLXNA1, with the expected lack of collapse in PLXNA1R1<sup>ΔECD</sup> and  
205 PLXNA1<sup>ΔCD</sup> (Figure 3E-N; Figure S2D-G). Together, these results suggest that GAP  
206 activity is necessary for PLXN-mediated promotion of HH signaling.

207

208 *PLXNA1 promotes HH signaling at the level of GLI activation*

209 HH signaling culminates in the differential processing and activation of the GLI  
210 family of transcription factors, which shuttle in and out of the primary cilium and are  
211 phosphorylated by several kinases to regulate their activity (Hui and Angers 2011).  
212 Transfecting *SmoM2*, a constitutively active form of Smoothed, or *Gli1*, an obligate  
213 HH activator, into our luciferase reporter assay in NIH/3T3 cells results in tens to  
214 thousands of fold induction of HH reporter activity, respectively. Still, co-transfecting

215 *SmoM2* or *Gli1* with *Plxna1<sup>ΔECD</sup>* results in a significantly greater HH response (Figure  
216 3O-P). Notably, this promotion requires GAP activity as co-transfection of *SmoM2* or  
217 *Gli1* with a GAP-deficient *Plxn* (*Plxna1r1<sup>ΔECD</sup>*) returns HH pathway activation to near-  
218 baseline levels (Figure 3O-P). These data suggest that PLXNs function downstream of  
219 HH ligand at the level of GLI regulation, and that full PLXN GAP activation via the  
220 release of extracellular autoinhibition is necessary for HH promotion with either *SmoM2*  
221 or *Gli1*.

222

223 *PLXNs are not enriched in the primary cilium, but do require primary cilia for HH*  
224 *pathway promotion*

225         The primary cilium is an important platform for HH signaling molecules (Wong  
226 et al. 2009; Goetz and Anderson 2010) and many HH pathway components, including  
227 NRP, are enriched there (Corbit et al. 2005; Haycraft et al. 2005; Rohatgi et al. 2007;  
228 Pinsky et al. 2017). Notably, molecules over 40 kDa are unable to freely diffuse into the  
229 primary cilium, requiring active transport to enter this highly regulated subcellular  
230 compartment (Kee et al. 2012). To test whether PLXNs localize to the primary cilium, we  
231 expressed MYC-tagged PLXNs in NIH/3T3 cells and performed immunofluorescent  
232 staining for MYC and Acetylated Tubulin (AcTub), which marks the primary cilium.  
233 PLXNs are broadly localized throughout the cell (Figure 4A-N), including the cell  
234 surface (cf. Figure 3E-N), but are largely excluded from the nucleus. Unlike NRP1,  
235 PLXN staining was not enriched within the primary cilium for any of the constructs we  
236 tested (Figure 4A-G). Mouse embryonic fibroblasts (MEFs) with a mutation in the dynein  
237 heavy chain (*Dync2h1<sup>lm/ln</sup>*) exhibit impaired retrograde transport within the cilium,

238 allowing for more robust detection of accumulated proteins (Ocbina et al. 2011).  
239 However, even in *Dync2h1<sup>ln/ln</sup>* MEFs, PLXNs still do not accumulate in the primary  
240 cilium (Figure 4H-N). These data suggest that PLXN localization to primary cilia is not  
241 required to regulate HH signal transduction.

242 To examine a potential requirement for primary cilia in PLXN-dependent  
243 promotion of HH signaling, we performed luciferase assays in WT NIH/3T3 cells as well  
244 as *Kif3a<sup>-/-</sup>* NIH/3T3 cells, which fail to assemble primary cilia (Engelke et al. 2019). As  
245 expected, WT NIH/3T3 cells activate HH signaling in response to *SmoM2* transfection,  
246 while *Kif3a<sup>-/-</sup>* NIH/3T3 cells do not (Figure 4O). Notably, *Kif3a<sup>-/-</sup>* NIH/3T3 cells also do  
247 not respond to co-transfection with *SmoM2* and *Plxna1<sup>ΔECD</sup>* (Figure 4O). Both GLI1 and  
248 GLI2ΔN have been reported to promote HH pathway activation in the absence of primary  
249 cilia (Haycraft et al. 2005; Wong et al. 2009). We confirmed these data by transfecting  
250 *Kif3a<sup>-/-</sup>* NIH/3T3 cells with either *Gli1* or *Gli2ΔN* (Figure 4P). Strikingly, and distinct  
251 from what we observe in WT NIH/3T3 cells, co-transfecting *Kif3a<sup>-/-</sup>* NIH/3T3 cells with  
252 either *Gli1* or *Gli2ΔN* and *Plxna1<sup>ΔECD</sup>* displayed no further promotion of HH-signaling  
253 (Figure 4P; cf. Figure 3P). These data suggest that, while PLXNs do not localize to the  
254 primary cilium, primary cilia are required for PLXN-dependent promotion of HH  
255 signaling.

256

257 *Constitutive Plxn GAP activity drives ectopic cell migration in the embryonic chicken*  
258 *neural tube*

259 The developing spinal cord requires HH signaling for proper patterning and  
260 development (Dessaud et al. 2008). SHH, which is initially secreted from the notochord,

261 signals in a ventral-dorsal gradient to specify distinct cell fates in the neural tube.  
262 Notably, SHH also controls cell proliferation and cell migration in this tissue (Cayuso  
263 and Marti 2005; Cayuso et al. 2006). Previous work demonstrated that multiple *Plxns* are  
264 expressed in the developing chicken neural tube concomitant with SHH-dependent tissue  
265 patterning (Mauti et al. 2006). To investigate potential contributions of PLXNs to these  
266 SHH-dependent outcomes, we employed chicken *in ovo* neural tube electroporation.  
267 While electroporation with an empty vector (*pCIG*) does not impact neural tube  
268 patterning (Fig 5A-D), *SmoM2* electroporation drives ectopic expression of NKX6.1 in  
269 the dorsal neural tube, a direct target of HH signaling that is normally restricted ventrally  
270 (Fig 5E-H). Similarly, electroporation with *Gli1*, an obligate activator of the HH pathway  
271 that drives high levels of HH signaling, also results in expansion of the NKX6.1 domain  
272 (Figure 5I-L). However, *Gli1* expression also results in ectopic migration of cells into the  
273 dorsal lumen of the neural tube, which is typically completely devoid of cells (Figure 5I;  
274 yellow asterisk). Electroporation of *Plxna1<sup>ΔECD</sup>* phenocopies *Gli1*-induced migration into  
275 the lumen of the neural tube (Figure 5M; yellow asterisk). In some *Plxna1<sup>ΔECD</sup>*-  
276 electroporated embryos, we observed a minor shift in the NKX6.1 domain (Figure 5P;  
277 yellow arrowhead). We also observed a similar trend in the PAX7 domain, which is  
278 largely devoid of HH signaling (Figure S3A-I). However, quantitation of the NKX6.1  
279 domain size revealed no significant differences between *pCIG*- and *Plxna1<sup>ΔECD</sup>*-  
280 electroporated embryos (Figure S3J-M). Further, cells electroporated with *Plxna1<sup>ΔECD</sup>* at  
281 the periphery of the endogenous NKX6.1 domain do not express NKX6.1, while cells in  
282 this same region that were electroporated with *Gli1* are NKX6.1 positive (Figure S3J-L).  
283 Importantly, PLXN-dependent ectopic cell migration is lost upon mutation of the

284 intracellular PLXN GAP domain (Figure 5Q-T). These data are consistent with our cell  
285 signaling assays, which indicate that PLXNs can promote GLI-dependent cellular  
286 responses.

287

288 *Plxna1* or *Plxna2* deletion results in decreased numbers of HH-responding cells within  
289 the dentate gyrus

290 *Plxns* are expressed widely throughout the developing mouse embryo, particularly  
291 in the central nervous system (Perala et al. 2005). Interestingly, developing neurons and  
292 progenitor cells in the hippocampus express *Plxns* (Cheng et al. 2001) and neuronal  
293 progenitor cells rely on HH signaling for proliferation and maintenance, particularly  
294 within the dentate gyrus (Machold et al. 2003; Ahn and Joyner 2005). To determine  
295 whether PLXNs impact HH signaling in the hippocampus, we crossed *Plxna1* and *Plxna2*  
296 deficient mice with a HH-responsive *Gli1lacZ* reporter allele and examined  $\beta$ -  
297 galactosidase activity along the rostro-ventral axis of dentate gyrus at postnatal day 7  
298 (P7). Strikingly, *Plxna1*<sup>-/-</sup> mice have significantly fewer *Gli1*-positive cells in both the  
299 dorsal and ventral dentate gyrus compared to their heterozygous littermates (Figure 6A-  
300 F). In addition, *Gli1*-positive cells in *Plxna1*<sup>-/-</sup> mice fail to properly migrate, similar to  
301 previously published HH loss-of-function models (Figure 6A-B) (Machold et al. 2003).  
302 *Plxna2* deletion has a similar effect on both *lacZ* expression and migration of *Gli1*-  
303 positive cells. Significantly fewer  $\beta$ -galactosidase positive cells are detected in the hilus  
304 and subventricular zone of the dorsal and ventral dentate gyrus (Figure 6G-L). Together,  
305 these data show that PLXNs can regulate HH pathway activation *in vivo* and suggest that  
306 multiple PLXNs regulate HH signaling in the developing mouse hippocampus.

307

## 308 **Discussion**

309           HH signaling plays important roles in tissue formation, homeostasis and repair,  
310 coordinating a number of cellular processes including proliferation, fate specification,  
311 and survival (Briscoe and Therond 2013). Canonical SEMA receptors, the NRPs and  
312 PLXNs, are expressed in a wide variety of tissues during active HH regulation (Kawasaki  
313 et al. 1999; Perala et al. 2005; Mauti et al. 2006; Perala et al. 2012). Here, we present  
314 evidence that PLXNs positively regulate HH signaling. Unlike many previously  
315 described cell surface HH regulators, which interact directly with HH ligands, PLXNs  
316 promote HH signaling through their cytoplasmic domains at the level of GLI regulation  
317 (Figure 7). More specifically, we find that GAP enzymatic activity within the PLXN  
318 cytoplasmic domain is required for HH promotion, and that constitutive GAP activity  
319 further amplifies the HH response. This shows that the PLXN GAP domain is important  
320 for canonical SEMA signaling as well as amplification of HH signaling. Further, we find  
321 that, while PLXNs themselves do not localize to primary cilia, they require primary cilia  
322 to promote HH pathway activity. Finally, our data indicate that increased *Plxn* activity *in*  
323 *ovo* increases cell migration into the neural tube lumen, and *Plxn* deletion *in vivo* results  
324 in reduced HH pathway activity in mice. Taken together, we provide multiple lines of  
325 evidence for a novel role of PLXNs in HH pathway regulation.

326

### 327 *Semaphorin Receptors Act Promiscuously in Multiple Signaling Pathways*

328           While NRPs and PLXNs were first described as SEMA receptors, they also  
329 function within other signaling pathways (He and Tessier-Lavigne 1997; Kolodkin et al.

330 1997; Takahashi et al. 1999; Tamagnone et al. 1999). NRPs play roles in VEGF signaling  
331 to regulate angiogenesis, and they interact with a wide variety of proteins, including  
332 PIGF-2, heparan sulfate, TGF- $\beta$ 1, HGF, PDGF, FGF, L1-CAM, integrins, and SARS-  
333 CoV-2 spike protein (Roth et al. 2008; Prud'homme and Glinka 2012; Muhl et al. 2017;  
334 Sarabipour and Mac Gabhann 2021). PLXNs also form complexes with off-track, MET,  
335 Ron, scatter factor, and VEGFR2 in various cellular contexts (Winberg et al. 2001;  
336 Giordano et al. 2002; Conrotto et al. 2004; Toyofuku et al. 2004). This raises many  
337 questions about the nature of these receptors' activities within individual and overlapping  
338 signaling contexts. For example, what factors determine whether PLXNs and NRPs  
339 function as SEMA receptors and whether they regulate HH signaling? Can these processes  
340 happen simultaneously, and if so, how do they influence one another? → Multiple lines  
341 of evidence link altered SEMA/PLXN signaling to cancer. Depending on context,  
342 aberrant SEMA signaling may promote or suppress tumor growth and lead to various  
343 types of cancer (Neufeld et al. 2016). The mechanisms by which altered PLXN signaling  
344 influence tumor growth are incompletely understood. A link to increased HH signaling is  
345 intriguing because of the well-established role of elevated HH signaling in malignancies.

346 Another outstanding question is how SEMA ligand impacts HH signaling. A role  
347 for SEMA ligands in HH pathway promotion remains unclear as conflicting pieces of  
348 evidence exist in the literature. In one study, addition of SEMA ligands in combination  
349 with HH ligand or SAG increased HH signaling in NIH/3T3 cells (Ge et al. 2015).  
350 Conversely, blocking NRP interaction with SEMA ligand reduces GLI expression (Ge et  
351 al. 2015). This model suggests that SEMA ligand increases recruitment of PDE4D to the  
352 cell membrane, which interacts with the NRP CD and inhibits PKA, a negative regulator



353 of GLI proteins (Ge et al. 2015). However, other studies suggest that addition of SEMA  
354 ligand has no effect on HH signaling (Hillman et al. 2011), and that NRPs still promote  
355 HH signaling when co-transfected with a version of GLI2 that cannot be phosphorylated  
356 by PKA at seven important sites (Pinsky et al. 2017). It is important to consider that  
357 NIH/3T3 cells, in which these studies were performed, express endogenous PLXNs  
358 (Figure S1). Given the results presented here, an alternate explanation of SEMA-  
359 mediated HH promotion is that SEMA ligands act through endogenous PLXNs to  
360 increase HH reporter activity by stimulating GAP activity. Another discrepancy in the  
361 literature concerns the requirement for the NRP ECD in HH promotion (Ge et al. 2015;  
362 Pinsky et al. 2017). Again, given that PLXNs promote HH signaling and that the NRP  
363 ECD mediates interactions with PLXN co-receptors, the variable effects that have been  
364 reported could be explained by the presence of endogenous PLXNs, the level of NRP  
365 overexpression, and the sensitivity of the assay.

366

### 367 *NRP and PLXN Cooperation in HH Signaling*

368 We previously reported that NRPs promote HH signaling through a novel  
369 cytoplasmic motif (Pinsky et al. 2017), within a region of the protein that is dispensable  
370 for SEMA signaling (Fantin et al. 2011). This suggests that NRPs may act very  
371 differently within SEMA and HH signaling contexts. PLXNs on the other hand, seem to  
372 function similarly in HH and SEMA signaling, through cytoplasmic GAP activity.  
373 Together, these data raise the question: do NRPs and PLXNs function together or  
374 separately in HH signaling? The answer may be both. Several pieces of evidence suggest  
375 that NRPs function independently of PLXNs in HH signaling. First, deleting the NRP

376 ECD, which mediates interaction between NRPs, PLXNs, and SEMA, does not disrupt  
377 HH pathway promotion (Pinsky et al. 2017). Furthermore, we report here that PLXNB2  
378 can promote HH signaling, despite its lack of reported interactions with NRPs (Neufeld  
379 and Kessler 2008). However, we cannot exclude the possibility that PLXN A subfamily  
380 members bind to endogenous NRPs to mediate HH promotion in our assays. Therefore,  
381 the ideas that NRPs and PLXNs function independently and together in HH signaling are  
382 not mutually exclusive, and additional studies will be required to elucidate their  
383 independent and/or cooperative roles.

384

#### 385 *Connecting PLXN GAP Activity to the HH Pathway*

386 We find that HH pathway activity is regulated by enzymatic activity of the PLXN  
387 GAP domain. However, it remains unclear how GAP downstream signaling intersects  
388 with the HH signal cascade. The PLXN cytoplasmic domain interacts with a plethora of  
389 intracellular proteins, including collapse-response-mediator protein (CRMP) family  
390 phosphoproteins, protein kinases, MICAL redox proteins, and small intracellular  
391 GTPases from the Rho, Ras, and Rap superfamilies (Puschel 2007; Yang and Terman  
392 2013; Jongbloets and Pasterkamp 2014). Further, our understanding of the cellular  
393 mechanisms downstream of the PLXN GAP domain remains incomplete, including  
394 which GTPases are regulated by various PLXN family members. This makes it difficult  
395 to identify candidates that might mediate HH signaling. Here, we find that PLXNs from  
396 both the A and B subfamilies can promote HH signaling, which may be an important clue  
397 in answering this question. While we cannot exclude the possibility that each PLXN or  
398 PLXN subfamily regulates HH differently, it is likely that they converge upon a common

399 protein or set of proteins that mediate HH promotion. Our data suggest that this  
400 convergence takes place at the level of GLI transcription factors and requires intact  
401 primary cilia. Therefore, candidates for future study should have common demonstrated  
402 roles downstream of all PLXNs.

403

#### 404 *PLXN Redundancy in HH Pathway Promotion*

405 As previously discussed, the PLXN family of proteins is comprised of nine  
406 members with distinct and overlapping functions (Neufeld and Kessler 2008). One shared  
407 feature between all PLXN proteins is the conserved cytoplasmic GAP domain (Neufeld  
408 and Kessler 2008), which we find mediates HH signal promotion. Therefore, our results  
409 are complicated by the presence of endogenous PLXN proteins that may act redundantly  
410 in the HH signaling cascade, particularly given that PLXNs from multiple subfamilies  
411 promote HH signaling. Though technically challenging, a PLXN null background would  
412 be necessary to truly study the function of individual PLXN family members in HH  
413 signaling. It is also important to consider that PLXNs exhibit largely overlapping  
414 expression patterns *in vivo*, further complicating loss-of-function studies (Perala et al.  
415 2005; Mauti et al. 2006). Notably, our results suggest that deleting *Plxna1* or *Plxna2*  
416 alone is sufficient to reduce HH target gene expression in the dentate gyrus (Figure 6),  
417 despite the widespread expression of additional *Plxns* in the central nervous system  
418 (Perala et al. 2005). Additional HH-responsive tissues that express a smaller subset of  
419 *Plxns*, including the olfactory epithelium, the tooth bud, and the lung (Perala et al. 2005),  
420 should be considered for broader *in vivo* studies.

421           Our study and many others highlight the complex, entangled nature of cell  
422 signaling molecules and pathways. While they are typically studied in isolation, it may be  
423 useful to instead consider signaling pathways as broader signaling networks, with  
424 overlapping inputs and outputs that combine to elicit cellular behaviors. By better  
425 understanding these systems, we can begin to decode the factors influencing cellular  
426 decision-making in developmental, homeostatic, and diseased states.

427

## 428 **Materials and Methods**

### 429 *Plxn Constructs*

430           *Plxn* constructs were derived from full length cDNAs using standard molecular  
431 biology techniques. All constructs were cloned into the *pCIG* vector, which contains a  
432 CMV enhancer, a chicken beta actin promoter, and an internal ribosome entry site (IRES)  
433 with a nuclear enhanced green fluorescent protein reporter (3XNLS-EGFP) (Megason  
434 and McMahon 2002). C-terminal or N-terminal 6X MYC tags (EQKLISEEDL) were  
435 added to constructs as indicated. Deletion and mutation variants were generated using  
436 standard cloning techniques and the QuickChange II XL Site-Directed Mutagenesis Kit  
437 (Agilent Technologies, 200521).

438

### 439 *Cell Culture and MEF generation*

440           Cell lines were maintained in Dulbecco's Modified Eagle Medium (DMEM;  
441 ThermoFisher Scientific, 11965-118) supplemented with 10% bovine calf serum (ATCC,  
442 30-2030) and 1X Penicillin-Streptomycin-Glutamine (Life Technologies, 10378016).

443 Cultures were maintained at 37 °C with 5% CO<sub>2</sub> and 95% humidity. MEFs were  
444 generated as previously described (Todaro and Green 1963).

445

#### 446 *Cell Signaling Assays*

447 Luciferase-based reporter assays for HH pathway activity in NIH/3T3 cells were  
448 performed as previously described using a *ptcΔ136-GL3* reporter construct (Nybakken et  
449 al. 2005). Briefly, cells were seeded at 2.5 X 10<sup>4</sup> cells/well into 0.5% gelatin-coated 24-  
450 well plates. The next day, cells were transfected with empty vector (*pCIG*) or  
451 experimental constructs along with the *ptcΔ136-GL3* luciferase reporter construct and  
452 beta-galactosidase transfection control (pSV-β-galactosidase; Promega, E1081).

453 Transfections were performed using Lipofectamine 2000 (Invitrogen, 11668) and Opti-  
454 MEM reduced serum media (Invitrogen, 31985). 48h after transfection, culture media  
455 was replaced with low-serum media (0.5% bovine calf serum, 1% Penicillin  
456 Streptomycin L-Glutamine) containing either control or N-terminal SHH (NSHH)-  
457 conditioned media. Luciferase reporter activity and Beta Galactosidase activity were  
458 measured 48h later on a Spectramax M5<sup>e</sup> Plate reader (Molecular Devices) using the  
459 Luciferase Assay System (Promega, E1501) and the Betafluor Beta Galactosidase Assay  
460 Kit (EMD Millipore, 70979), respectively. Luciferase values were divided by beta  
461 galactosidase activity to control for transfection, and data were reported as fold induction  
462 relative to the vector-transfected control. All treatments were performed in triplicate  
463 (each data point indicates a technical replicate) and averaged (bar height), with error bars  
464 representing the standard deviation between triplicate wells. Each experiment was  
465 repeated a minimum of three times (biological replicates); representative results are

466 shown. Student's t-tests were used to determine whether each treatment was significantly  
467 different from the control, with P-values of 0.05 or less considered statistically  
468 significant.

469

#### 470 *Immunofluorescent Analyses for cultured cells*

471 NIH/3T3 fibroblasts were plated at  $1.5 \times 10^5$  cells/well onto glass coverslips in a  
472 6-well dish. Cells were transfected 24h after plating using Lipofectamine 2000  
473 (Invitrogen, 11668) and Opti-MEM reduced serum media (Invitrogen, 31985). To assess  
474 expression and collapse, cells were incubated for 24-48h at 37 °C as indicated. To image  
475 cilia, cells were placed in low serum media approximately 6h after transfection (0.5%  
476 bovine calf serum, 1% Penicillin Streptomycin L-Glutamine) for 48h. All cells were fixed  
477 in 4% paraformaldehyde for 10min at room temperature and washed with PBS. A 5min  
478 permeabilization step with 0.2% Triton X-100 in PBS was performed as indicated, prior  
479 to staining. Primary antibodies included: mouse IgG2a anti-MYC (1:1000, Cell  
480 Signaling, 2276), goat IgG anti-PLXNA1 (1:250, R&D Systems, AF4309), and mouse  
481 IgG2b anti-acetylated tubulin (1:2500, Sigma Aldrich, T7451), all diluted in IF blocking  
482 buffer (list reagents please – I don't have the recipe on hand!). Coverslips were incubated  
483 with primary antibodies overnight, followed by a 10min DAPI stain (1:30,000 in PBS at  
484 room temperature, Invitrogen, D1306) and 1h incubation with secondary antibodies  
485 including: AlexaFluor 555 goat anti-mouse IgG2a, AlexaFluor 488 donkey anti-goat IgG,  
486 AlexaFluor 488 goat anti-mouse IgG2b, and AlexaFluor 555 goat anti-mouse IgG2b  
487 (1:500, Invitrogen, A21137, A11055, A21141, and A21147, respectively). Coverslips  
488 were mounted to glass slides using Shandon Immu-Mount Mounting Medium (Fisher,

489 9990412). Immunofluorescent analysis and imaging were performed on a Leica SP5X  
490 Upright 2-Photon Confocal microscope using LAS AF software (Leica) and a Leica 63X  
491 (type: HC Plan Apochromat CS2; NA1.2) water immersion objective.

492

#### 493 *Western Blot Analysis*

494 NIH/3T3 cells were transfected using Lipofectamine 2000 (Invitrogen, 11668)  
495 and Opti-MEM reduced serum media (Invitrogen, 31985). Cells were lysed in  
496 radioimmunoprecipitation assay (RIPA) buffer (50 mM Tris-HCl, pH 7.2, 150 mM NaCl,  
497 0.1% Triton X-100, 1% sodium deoxycholate, and 5 mM EDTA) 48h after transfection,  
498 sonicated using a Fisher Scientific Sonic Dismembrator, Model 500 (4 pulses at 20%),  
499 and centrifuged at 14,000 x g for 25min at 4 °C to remove the insoluble fraction. Protein  
500 concentrations were determined using the BCA Protein Assay Kit (Fisher, PI23225).  
501 After boiling for 10min, 50µg of protein from each sample were separated using SDS-  
502 PAGE with 7.5-12.5% gels and transferred onto Immun-Blot PVDF membranes (Bio-  
503 Rad, 162-0177). Membranes were washed in tris-buffered saline (TBS) with 0.5%  
504 OmniPur Tween-20 (TBST; EMD Millipore, 9480) and blocked in western blocking  
505 buffer (30 g/L Bovine Serum Albumin with 0.2% NaN<sub>3</sub> in TBST) for 1h to overnight.  
506 Blots were probed with the following antibodies: rabbit IgG anti-MYC (1:10,000, Bethyl  
507 Labs, A190-105A), goat IgG anti-PLXNA1 (1:200, R&D Systems, AF4309), and Mouse  
508 IgG1 anti-Beta Tubulin (1:10,000, generously provided by Dr. Kristen J. Verhey,  
509 University of Michigan). Secondary antibodies from Jackson ImmunoResearch were  
510 diluted 1:10,000, and included: peroxidase-conjugated AffiniPure goat anti-mouse IgG,  
511 light chain specific (115-035-174), peroxidase-conjugated AffiniPure F(ab)<sub>2</sub> Fragment

512 donkey anti-rabbit IgG (711-036-152), and peroxidase-conjugated AffiniPure donkey  
513 anti-goat IgG, light chain specific (705-035-147). Immobilon Western Chemiluminescent  
514 HRP Substrate (EMD Millipore, WBKLS0500) was added for 10min before membranes  
515 were exposed to HyBlot CL Autoradiography Film (Denville, E3018) and developed  
516 using a Konica Minolta SRX-101A Medical Film Processor.

517

#### 518 *RNAi*

519 RNAi was performed using Lipofectamine RNAiMAX Transfection Reagent  
520 (ThermoFisher Scientific, 13778150) with BLOCK-iT Fluorescent Oligo as a transfection  
521 control (ThermoFisher Scientific, 13750062). *Plxn* knockdown was performed using  
522 Dharmacon ON-TARGET<sup>plus</sup> SMARTpool reagents with catalog numbers L-040789-  
523 01-0005, L-040790-01-0005, L-040791-01-0005, L-040980-00-0005, and L-056934-01-  
524 0005 for *Plxna1*, *Plxna2*, *Plxna3*, *Plxnb2*, and *Plxnd1*, respectively. *Nrp* oligos included  
525 *Nrp1*: GCACAAAUCUCUGAAACUA; and *Nrp2*: GACAAUGGCUGGACACCCA.

526

#### 527 *RT-qPCR*

528 NIH/3T3 cells were cultured as previously described and treated with low-serum  
529 media (0.5% bovine calf serum, 1% Penicillin Streptomycin L-Glutamine) containing  
530 SAG as indicated. RNA was isolated using the RNAqueous kit (ThermoFisher Scientific,  
531 AM1912). cDNA was generated using 1 µg of template RNA (iScript RT Supermix,  
532 BioRad, 1708841). cDNA was diluted 1:100, and qPCR was performed using SYBR  
533 green master mix (ThermoFisher Scientific, AM9780) on an Applied BioSystems  
534 StepOnePlus Real-Time PCR System with the following primers: *Glil* forward:



535 GTGCACGTTTGAAGGCTGTC; *Gli1* reverse: GAGTGGGTCCGATTCTGGTG; *Ptch1*  
536 forward: GAAGCCACAGAAAACCCTGTC; *Ptch1* reverse:  
537 GCCGCAAGCCTTCTCTAGG; *Cyclophilin* forward:  
538 TCACAGAATTATTCCAGGATTCATG; and *Cyclophilin* reverse:  
539 TGCCGCCAGTGCCATT. *Cyclophilin* expression was used for normalization.

540

#### 541 *Chicken in ovo Neural Tube Electroporation*

542       Electroporations were performed as previously described (Tenzen et al. 2006),  
543 using *Plxn*, *SmoM2*, and *Gli1* constructs cloned into the pCIG vector (Megason and  
544 McMahon 2002). Briefly, DNA constructs (1.0  $\mu\text{g}/\mu\text{l}$ ) were mixed with 50 ng/ $\mu\text{l}$  Fast  
545 green FCF dye (Millipore Sigma, F7252) and injected into the neural tube of Hamburger  
546 Hamilton stage 11-13 chicken embryos (Hamburger and Hamilton 1951). Embryos were  
547 dissected 48-hours post-injection and screened for GFP expression before being fixed in  
548 4% PFA and prepared for immunofluorescent analysis. Embryos were embedded in  
549 Tissue-Tek OCT compound (Thermo Fisher Scientific, NC9806257), rapidly frozen over  
550 dry ice, and cryo-sectioned at a thickness of using a Leica cryostat. Twelve micron thick  
551 samples were affixed to glass slides and immunostained using the following antibodies:  
552 mouse IgG1 anti-PAX7 (1:20, Developmental Studies Hybridoma Bank, DSHB), mouse  
553 IgG1 anti-NKX6.1 (1:20, DSHB), goat IgG anti-GFP (1:200, Abcam, ab6673), rabbit  
554 IgG anti-MYC (1:100, Bethyl Laboratories, A190-205A). Slides were incubated with  
555 primary antibody overnight at 4°C followed by a 10min DAPI stain (1:30,000 at room  
556 temperature, Invitrogen, D1306) and 1h incubation with secondary antibodies including:  
557 AlexaFluor 555 donkey anti-mouse IgG, AlexaFluor 488 donkey anti-goat IgG,

558 AlexaFlour 647 donkey anti-rabbit IgG (1:500, Invitrogen, A31570, A11055, A31573,  
559 respectively). Samples were visualized on a Leica Upright SP5X Light Laser Confocal  
560 Microscope, and figures were generated using Adobe Photoshop and Illustrator. The size  
561 of the NKX6.1 domain was measured using Adobe Illustrator in chicken neural tubes  
562 electroporated with *pCIG* (n=6), *Gli1* (n=4), and *Plxna1<sup>ΔECD</sup>* (n=17). These measurements  
563 were then normalized to the NKX6.1 domain size of the unelectroporated side of the  
564 neural tube.

565

566 *Mice*

567 *Plxna1* (Yoshida et al. 2006) and *Plxna2* (Suto et al. 2007; Duan et al. 2014)  
568 mice, both on mixed genetic backgrounds, were generously provided by Dr. Alex  
569 Kolodkin. *Gli1<sup>lacZ</sup>* animals were maintained on a mixed CD1 and C57BL/6J background  
570 (Bai et al. 2002). All mice were housed and cared for according to NIH guidelines, and  
571 all animal research was approved by the University of Michigan Medical School  
572 Institutional Animal Care and Use Committee. *Plxn* genotyping was performed using the  
573 following primers: *Plxna1* WT\_F: CCTGCAGATTGATGACGACTTCTG; *Plxna1*  
574 WT\_R: TCATGAGACCCAGTCTCCCTGTC; *Plxna1* MT\_F:  
575 GCATGCCTGTGACACTTGGCTCACT; *Plxna1* MT\_R:  
576 CCATTGCTCAGCGGTGCTGTCCATC; *Plxna2* WT\_F:  
577 GCTGGAACCATGTGAGAGCTGATC; *Plxna2* WT\_R:  
578 GGTCATCTAGTCGCAGGAGCTTGC; *Plxna2* MT\_F:  
579 GGTCATCTAGTCGCAGGAGCTTGC; *Plxna2* MT\_R:  
580 TACCCGTGATATTGCTGAAGAGCTTGG. Tissue preparation and X-gal staining

581 were performed as previously described (Duan et al. 2014; Holtz et al. 2015). Briefly,  
582 serial sagittal sections (16 $\mu$ m) were collected from P7 brains and mounted onto six slides.  
583 One slide from each animal was used for X-gal staining. The total number of X-gal  
584 positive cells was quantified from eight serial sections per slide to yield the average  
585 number of X-gal positive cells per animal; each data point represents a single animal.

586

### 587 **Acknowledgements**

588 We are grateful to Dr. A. L. Kolodkin (Johns Hopkins University, MD, USA) for  
589 providing *Plxn* constructs. Members of the Allen and Giger labs contributed technical  
590 assistance, insightful comments, and helpful suggestions. We are also thankful to Drs. K.  
591 S. O'Shea, K. J. Verhey, and J. D. Engel for sharing equipment and reagents. Confocal  
592 imaging was performed in the Microscopy Core at the University of Michigan. We  
593 acknowledge the ENCODE consortium, and particularly the lab of Dr. John  
594 Stamatoyannopoulos at the University of Washington for sharing their RNA-seq dataset  
595 on NIH/3T3 cells (GEO: GSM970853). J.M.P. was supported by a Rackham Merit  
596 Fellowship, Benard Maas Fellowship, Bradley Merrill Patten Fellowship, Organogenesis  
597 Training Grant (T32 HD007505), and Ruth L. Kirschstein National Research Service  
598 Award (F31 NS096734). R.J.G. is supported by the Adelson Medical Foundation, Craig  
599 H. Neilsen Foundation, and funding from the National Institutes of Health (R01  
600 MH119346). B.L.A. is supported by funding from the National Institutes of Health (R01  
601 DC014428, R01 CA198074 and R01 GM118751). B.L.A. and R.J.G. are supported by an  
602 MCubed Research Grant from The University of Michigan.

603

604 **Author Contributions**

605 J.M. Pinskey: Conceptualization, Validation, Formal Analysis, Investigation, Writing-  
606 Original Draft, Writing- Review & Editing. T.M. Hoard: Conceptualization, Validation,  
607 Formal Analysis, Investigation, Writing- Original Draft, Writing- Review & Editing. X-F  
608 Zhao: Formal Analysis, Investigation. N.E. Franks: Formal Analysis, Investigation. Z.C.  
609 Frank: Investigation. A.N. McMellen: Investigation. R.J. Giger: Conceptualization,  
610 Resources, Formal Analysis, Investigation, Writing- Original Draft, Writing- Review and  
611 Editing. B.L. Allen: Conceptualization, Resources, Formal Analysis, Supervision,  
612 Funding Acquisition, Investigation, Methodology, Project Administration, Writing-  
613 Original Draft, Writing- Review and Editing.

Pinsky and Hoard et al., 2021, Figure 1

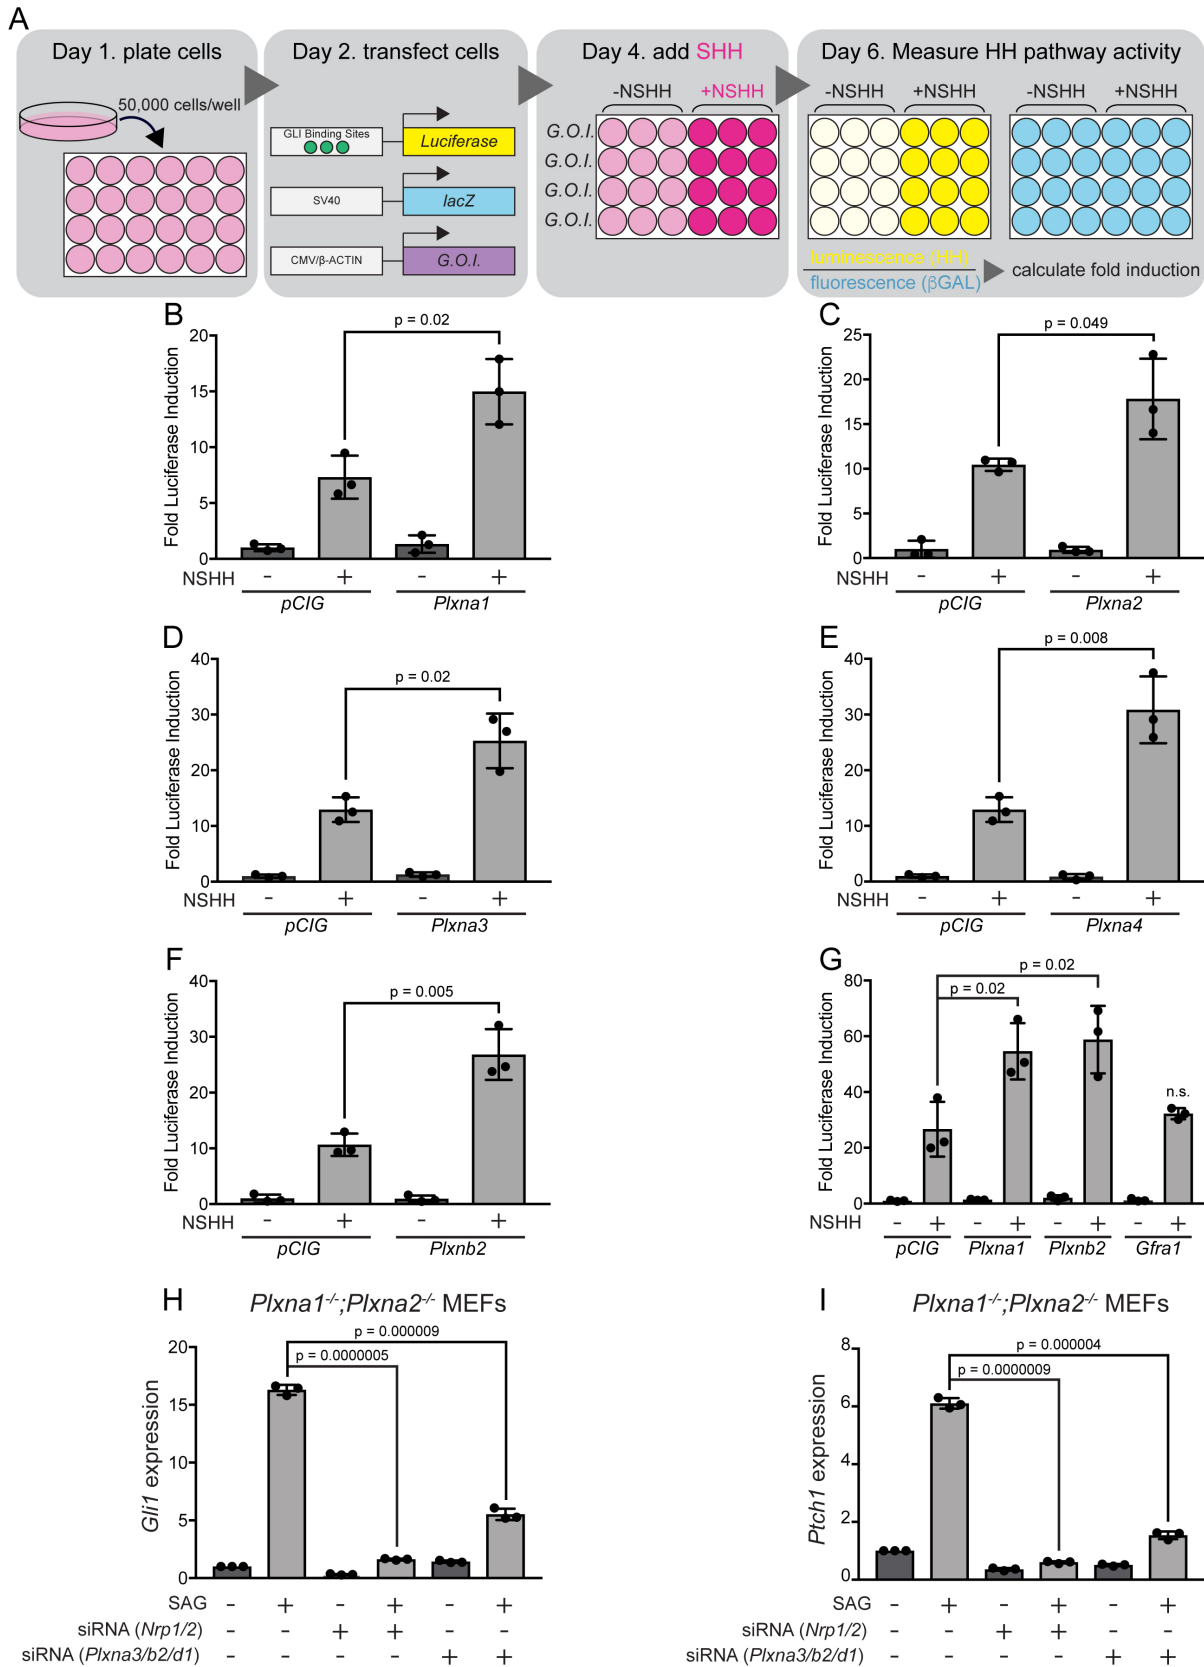

615 **Figure 1. Multiple PLXNs promote HH signaling.**

616 (A) Schematic of HH-responsive NIH/3T3 luciferase assays. G.O.I, gene of interest.

617 (B-F) HH-dependent luciferase reporter activity was measured in NIH/3T3 cells

618 transfected with the indicated constructs and stimulated with control (-NSHH) or NSHH-

619 conditioned media (+NSHH). (G) Direct analysis of PLXNA1- and PLXNB2-mediated

620 HH pathway promotion, compared with the unrelated cell surface protein GFR $\alpha$ 1. (H-I)

621 qRT-PCR analysis of *Gli1* and *Ptch1* in response to HH pathway activation via the

622 Smoothened agonist, SAG. *Plxna1*<sup>-/-</sup>; *Plxna2*<sup>-/-</sup> MEFs were treated with siRNA oligos for

623 either *Nrp1* and *Nrp2* or *Plxna3*, *Plxnb2*, and *Plxnd1*, as indicated. Data points indicate

624 technical replicates. Fold changes were determined using the  $\Delta\Delta$ CT method. Data are

625 reported as mean fold induction  $\pm$  S.D., with p-values calculated using two-tailed

626 Student's t tests. n.s. = not significant.

627

628 **Figure 1- Source Data 1**

629 Raw Data for Figure 1B-I

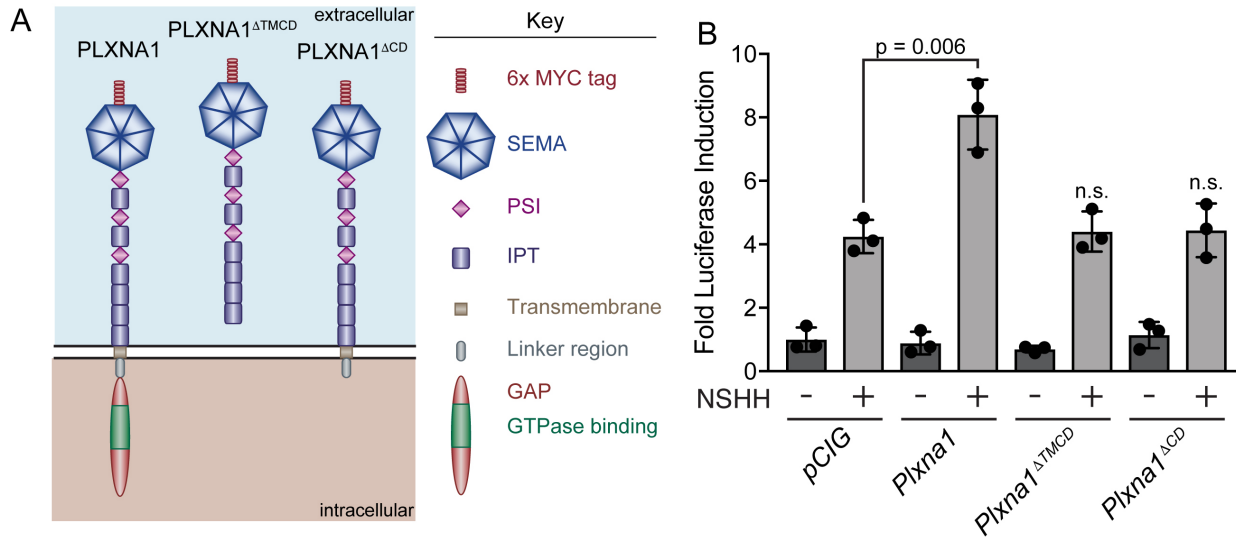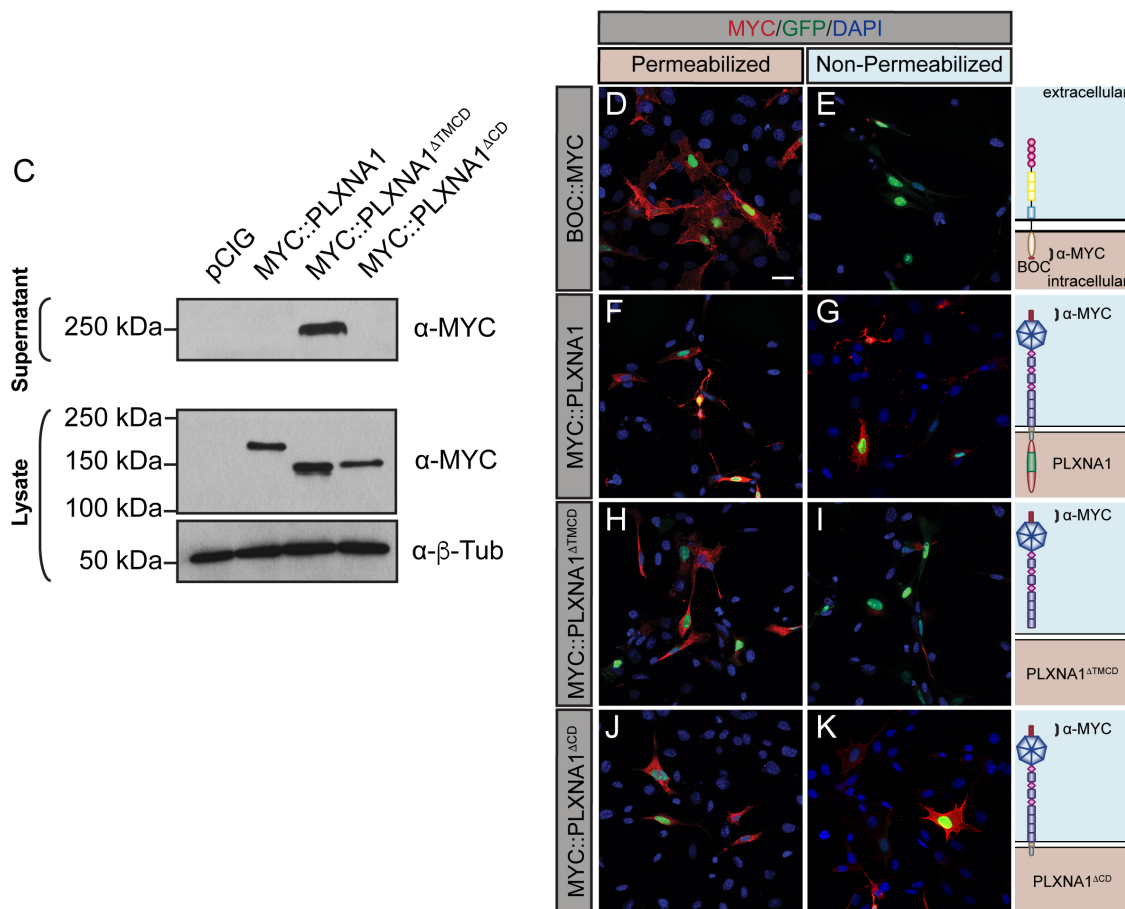

631 **Figure 2. The PLXNA1 cytoplasmic and transmembrane domains are required for**  
632 **HH pathway promotion.** (A) Schematic of different PLXNA1 proteins. (B) HH-  
633 dependent luciferase reporter activity was measured in NIH/3T3 cells transfected with the  
634 indicated constructs and stimulated with control (-NSHH) or NSHH-conditioned media  
635 (+NSHH). Data are reported as mean fold induction  $\pm$  S.D. with p-values calculated using  
636 two-tailed Student's t tests. n.s. = not significant. (C) Western blot analysis confirming  
637 expression of MYC-tagged PLXNA1 proteins in NIH/3T3 cells. Note that  
638 MYC::PLXNA1 <sup>$\Delta$ TMCD</sup> is detected in the supernatant, consistent with its predicted  
639 secretion. Anti-Beta-tubulin ( $\alpha$ - $\beta$ -Tub) was used as a loading control. (D-K) Antibody  
640 detection of MYC (red) in permeabilized (left panels) and non-permeabilized (right  
641 panels) NIH/3T3 cells to assess cell surface localization of the indicated MYC-tagged  
642 proteins. Note that BOC, which contains a C-terminal MYC tag is only detected under  
643 permeabilized conditions, while PLXNA1 <sup>$\Delta$ TMCD</sup>, which is secreted, is also largely  
644 undetected under non-permeabilized conditions. Nuclear GFP (green) indicates  
645 transfected cells, whereas DAPI (blue) stains all nuclei. Diagrams (right) describe each  
646 construct, with brackets indicating antibody binding sites. Scale bar = 10 $\mu$ m.

647

648 **Figure 2- Source Data 1**

649 Raw data for Figure 2B

650 **Figure 2- Source Data 2**

651 Raw, unedited blot from Figure 2C

652 **Figure 2- Source Data 3**

653 Raw, unedited blot from Figure 2C



654 **Figure 2- Source Data 4**

655 Raw, unedited blot from Figure 2C

656 **Figure 2- Source Data 5**

657 Raw, labeled blot from Figure 2C

658 **Figure 2- Source Data 6**

659 Raw, labeled blot from Figure 2C

660 **Figure 2- Source Data 7**

661 Raw, labeled blot from Figure 2C

Pinsky and Hoard et al., 2021, Figure 3

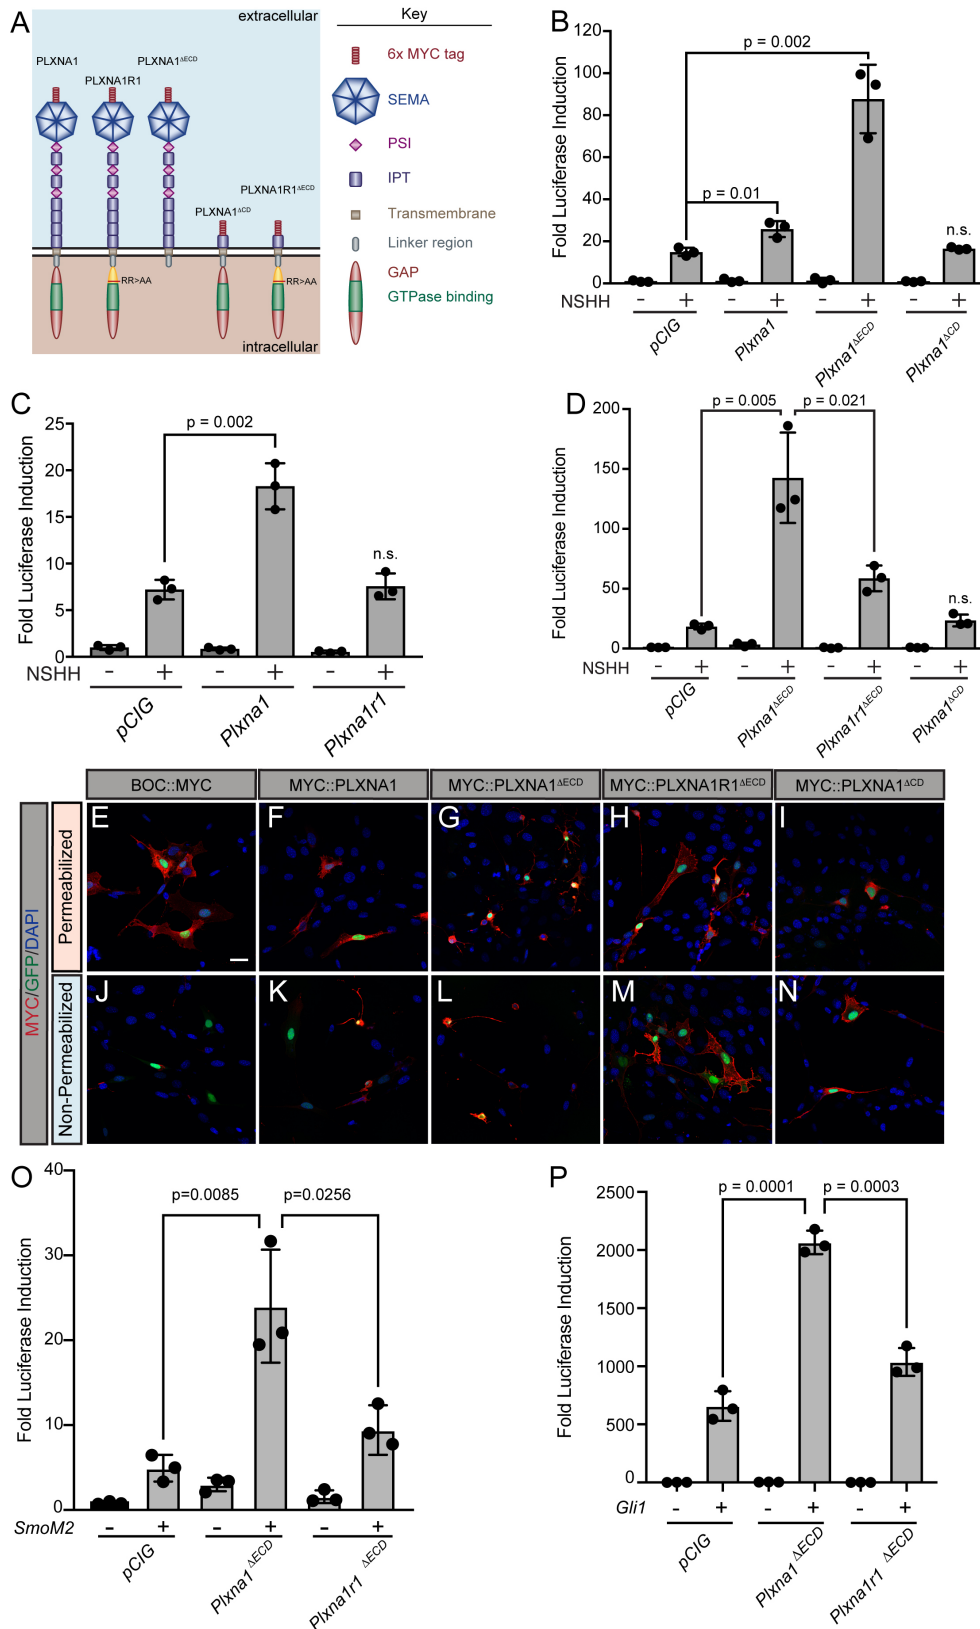

663 **Figure 3. The Plexin GAP domain is required to promote Hedgehog signaling at the**  
664 **level of GLI transcription factors.** (A) Schematic of different PLXNA1 proteins. (B-D)  
665 HH-dependent luciferase reporter activity was measured in NIH/3T3 cells transfected  
666 with the indicated constructs and stimulated with control (-NSHH) or NSHH-conditioned  
667 media (+NSHH). Data are reported as mean fold induction  $\pm$  S.D. with p-values  
668 calculated using two-tailed Student's t tests. n.s. = not significant. (E-N) Antibody  
669 detection of MYC-tagged proteins (red) in permeabilized (top panels) and non-  
670 permeabilized (bottom panels) NIH/3T3 cells to assess cell surface localization of the  
671 indicated constructs. Nuclear GFP (green) indicates transfected cells, whereas DAPI  
672 (blue) stains all nuclei. Note that constitutive PLXN GAP activity leads to cell collapse,  
673 as is observed with PLXNA1 <sup>$\Delta$ ECD</sup> and, to some extent, PLXNA1. For PLXNA1R1  
674 localization, please see Figure S2, D-E. Scale bar = 10  $\mu$ m. (O-P) HH-dependent  
675 luciferase reporter activity was measured in NIH/3T3 cells transfected with the indicated  
676 constructs and stimulated by co-transfecting cells with *pCIG*, *SmoM2* (O), or *Gli1* (P).  
677 Data are reported as mean fold induction  $\pm$  S.D., with p-values calculated using two-  
678 tailed Student's t tests. n.s. = not significant.

679

### 680 **Figure 3- Source Data 1**

681 Raw data for Figure 3B-D and Figure 3O-P

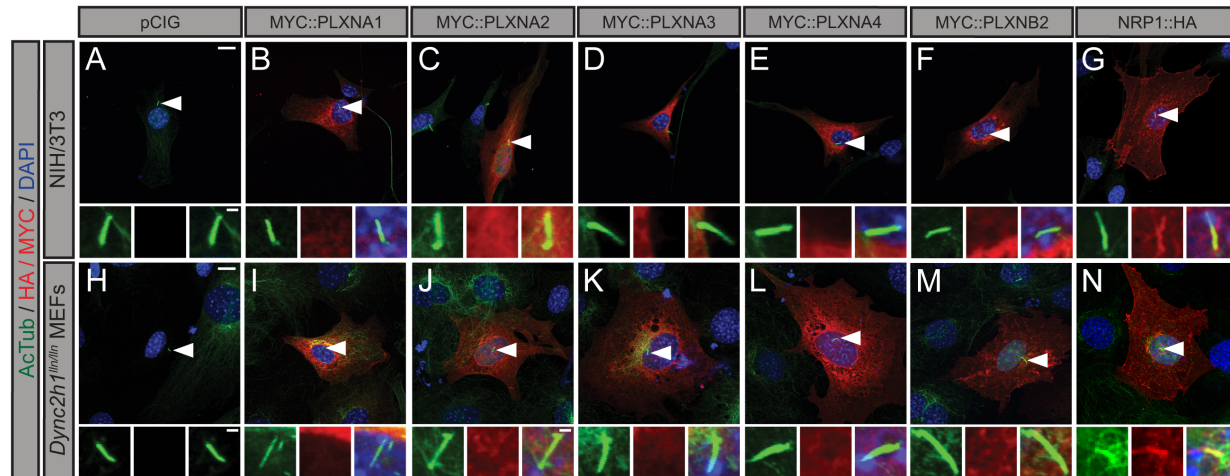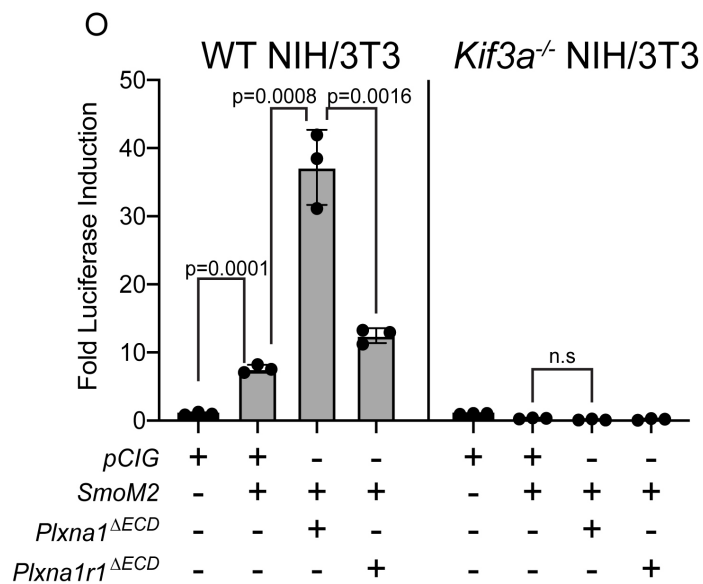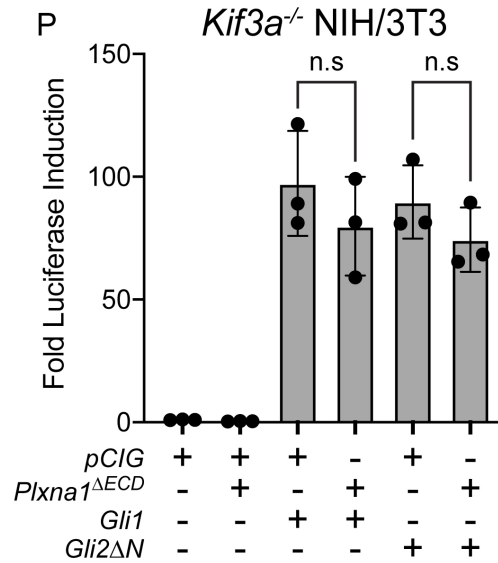

683 **Figure 4. PLXNs do not localize to primary cilia, but do require primary cilia to**  
684 **promote HH pathway activity.** (A-N) Antibody detection of MYC and HA tagged  
685 constructs (red) in NIH/3T3 cells (A-G) and *Dync2h1<sup>ln/ln</sup>* MEFs (H-N). Acetylated  
686 tubulin (AcTub, green) indicates the primary cilium and DAPI (blue) stains nuclei.  
687 Compared to NRP1, PLXNs are not enriched in primary cilia. Scale bar = 10  $\mu$ m. Inset  
688 scale bar = 1  $\mu$ m. (O) WT NIH/3T3 cells or *Kif3a<sup>-/-</sup>* NIH/3T3 cells were co-transfected  
689 with *SmoM2* and *Plxna1<sup>AECD</sup>* or *Plxna1r1<sup>AECD</sup>*. (P) *Kif3a<sup>-/-</sup>* NIH/3T3 were transfected with  
690 *Gli1* or *Gli2 $\Delta$ N* and co-transfected with *Plxna1<sup>AECD</sup>*. Data are reported as mean fold  
691 induction  $\pm$  S.D., with p-values calculated using two-tailed Student's t tests. n.s. = not  
692 significant.

693

694 **Figure 4- Source Data 1**

695 Raw data for Figure 4 O-P

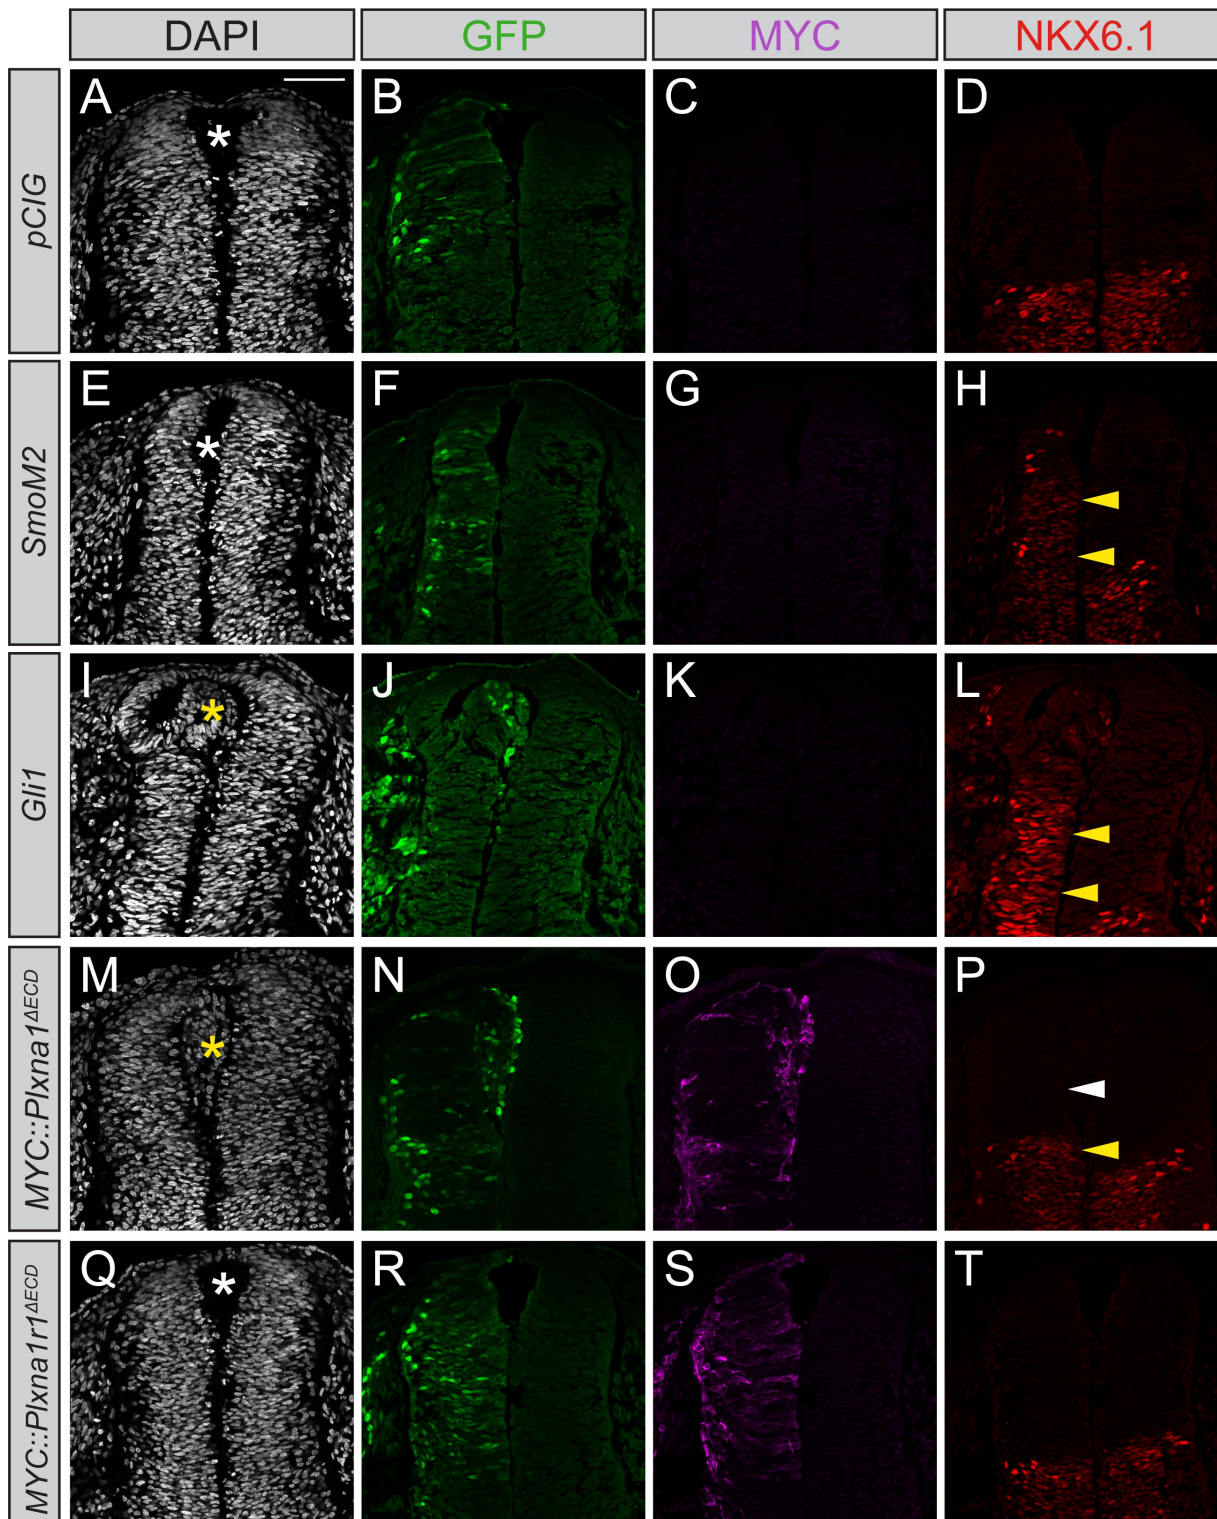

697 **Figure 5. Constitutively active PLXNA1 induces ectopic cell migration into the**  
698 **lumen of the developing chicken neural tube.** (A-T) Immunofluorescent analysis of  
699 neural patterning in forelimb-level sections from Hamburger-Hamilton stage 21-22  
700 chicken embryos. Embryos were electroporated at Hamburger-Hamilton stage 11-13 with  
701 *pCIG* (A-D, n= 6 embryos), *SmoM2* (E-H, n = 7 embryos), *Gli1* (I-L, n = 4 embryos),  
702 *MYC::Plxna1<sup>ΔECD</sup>* (M-P, n = 17 embryos), or *MYC::Plxna1r1<sup>ΔECD</sup>* (Q-T, n = 6 embryos).  
703 Transverse sections were stained with GFP, MYC, and NKX6.1 antibodies. DAPI stain  
704 labels nuclei (gray). Electroporated cells are labeled with GFP. Asterisks denote the  
705 presence (yellow) or absence (white) of ectopic cells within the lumen of the neural tube.  
706 Arrowheads denote the presence (yellow) or absence (white) of ectopic NKX6.1. Scale  
707 bar = 50 μm.

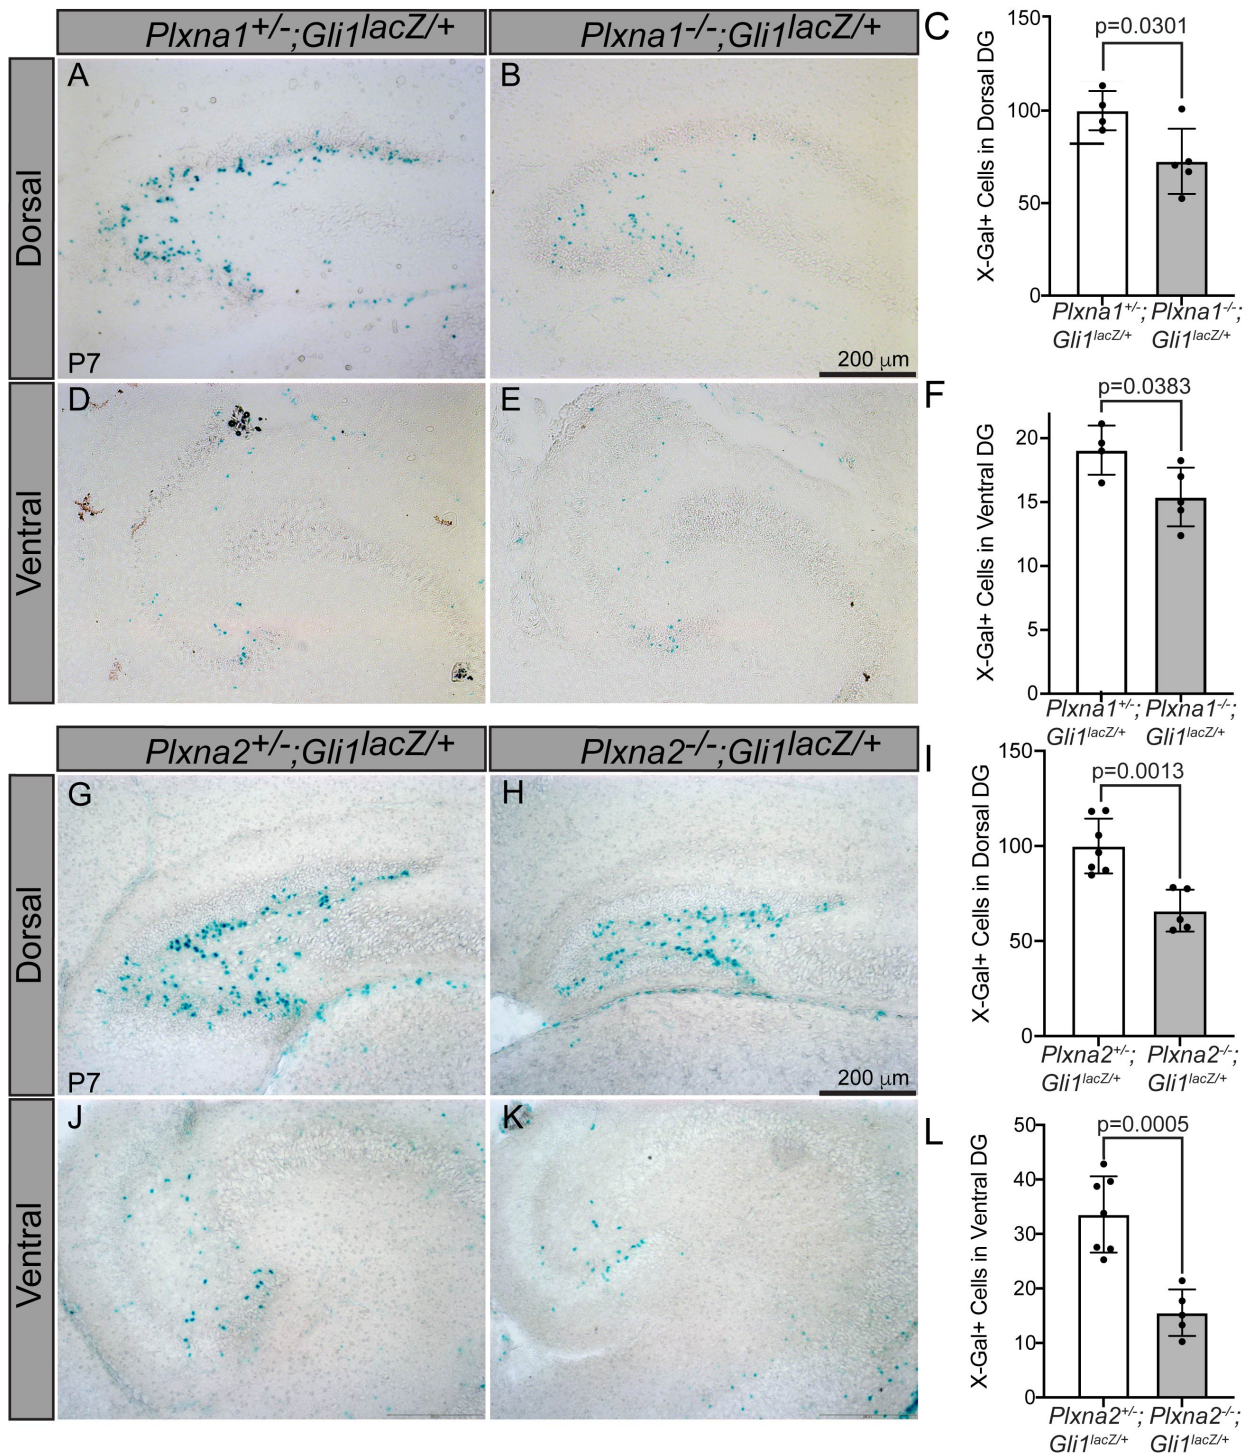



709 **Figure 6. Reduced *Gli1<sup>lacZ</sup>* expression in the dentate gyrus of mice lacking either**  
710 ***Plxna1* or *Plxna2*.** X-Gal staining in coronal sections through the dorsal (A, B, G, and H)  
711 and ventral (D, E, J, and K) hippocampus of postnatal day 7 (P7) mice. The following  
712 numbers of pups were analyzed: *Plxna1<sup>+/-</sup>;Gli1<sup>lacZ/+</sup>* (n=4); *Plxna1<sup>-/-</sup>;Gli1<sup>lacZ/+</sup>* (n=5);  
713 *Plxna2<sup>+/-</sup>;Gli1<sup>lacZ/+</sup>* (n=7); *Plxna2<sup>-/-</sup>;Gli1<sup>lacZ/+</sup>* (n=5). Quantitation of *Gli1<sup>lacZ</sup>* positive cells  
714 (C, F, I, and L) reported as mean  $\pm$  S.D. with p-values calculated using two-tailed  
715 Student's t test. DG = dentate gyrus. Scale bar = 200  $\mu$ m.

716

717 **Figure 6- Source Data 1**

718 Raw data for Figure 6C, F, I, L

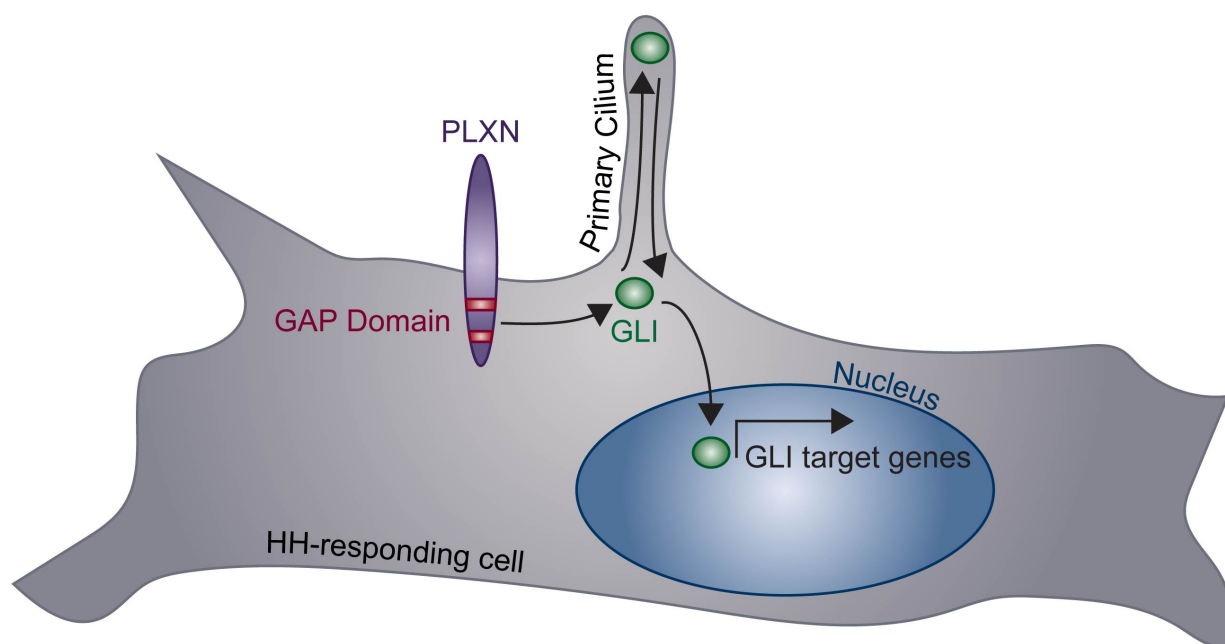

720 **Figure 7. Model of PLXN-mediated promotion of HH pathway activity.**

721 PLXNs (purple) at the cell surface promote HH signaling through GLI transcription

722 factor (green) activation, mediated by their cytoplasmic GAP activity (red). Notably, this

723 PLXN-dependent promotion requires primary cilia to induce GLI target gene expression

724 in the nucleus.

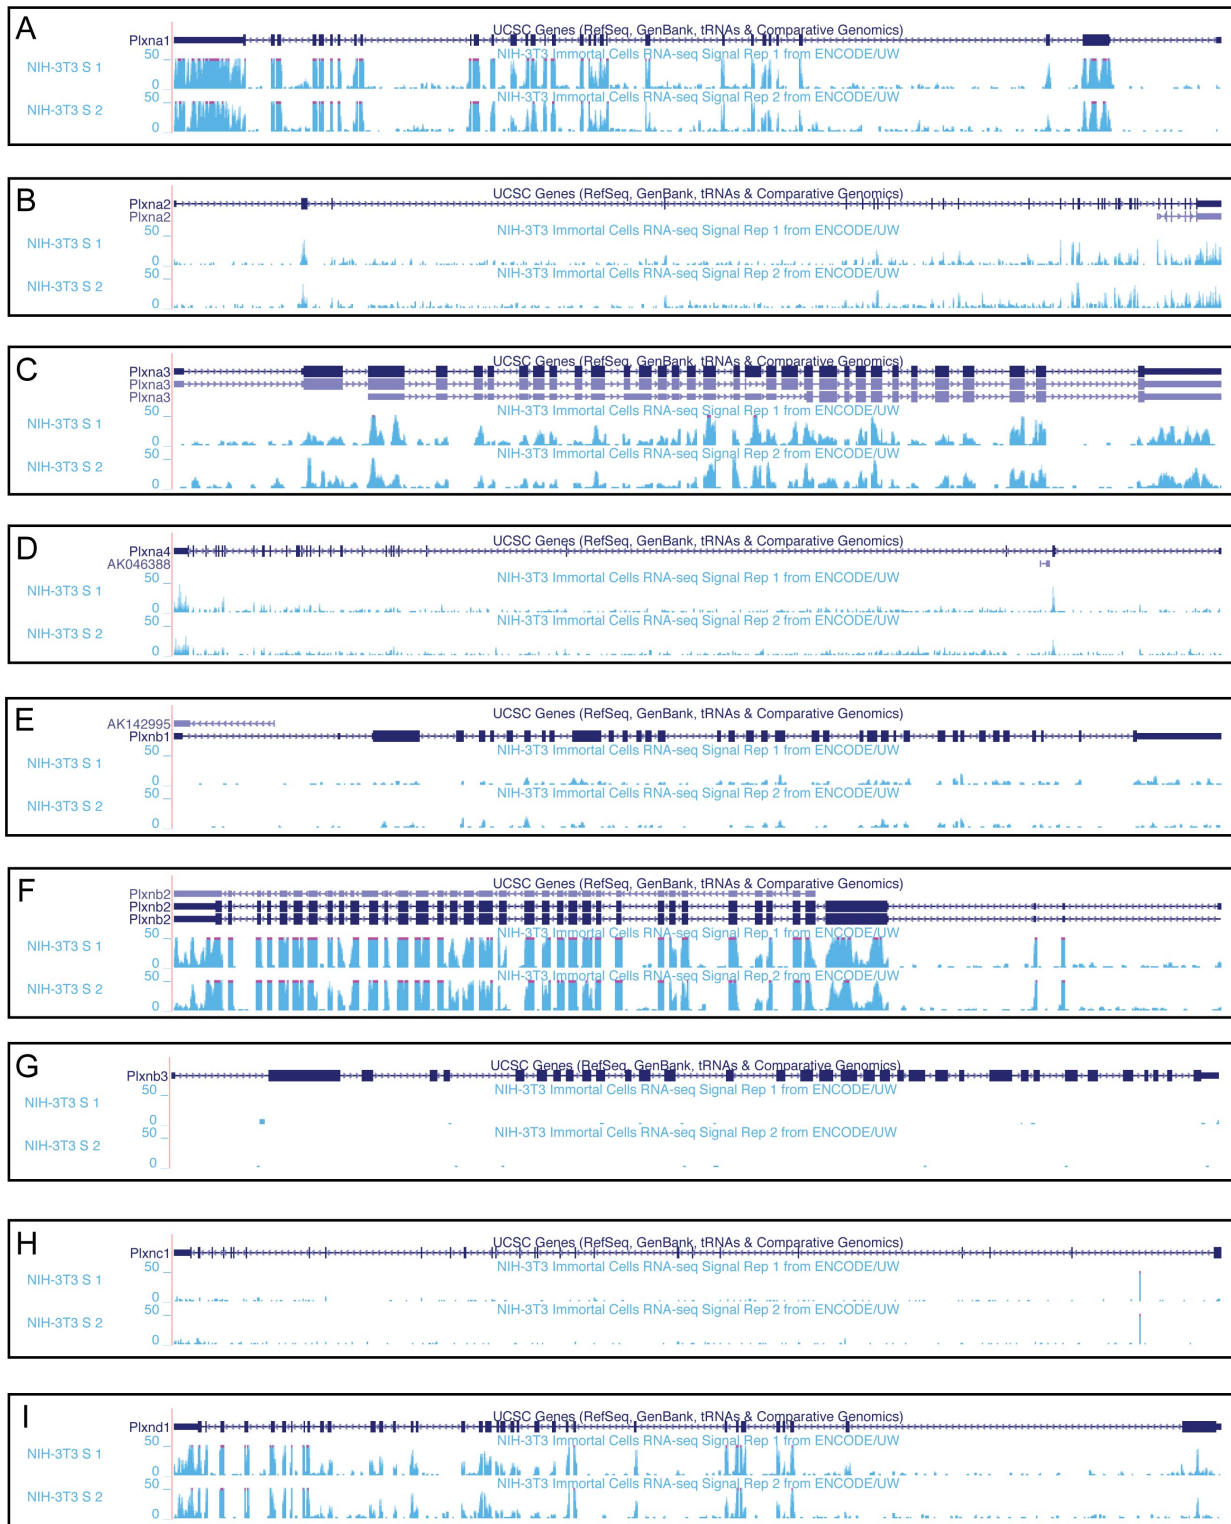

726 **Figure S1. *Plxn* expression in NIH/3T3 fibroblasts.**

727 RNA sequencing data from the ENCODE project indicating *Plxn* expression in NIH/3T3

728 cells. Data were aligned to the mouse GRCm38/mm10 assembly using the UCSC

729 Genome Browser (<https://genome.ucsc.edu>).

| A    | PLXNA1      |         | PLXNA1 <sup>ΔECD</sup> |         |
|------|-------------|---------|------------------------|---------|
|      | fold change | p-value | fold change            | p-value |
| 1    | 1.63        | 0.024   | 6.85                   | 0.0004  |
| 2    | 1.50        | 0.047   | 3.69                   | 0.00001 |
| 3    | 1.33        | 0.036   | 4.80                   | 0.007   |
| 4    | 1.77        | 0.056   | 10.42                  | 0.00005 |
| 5    | 1.72        | 0.011   | 5.85                   | 0.002   |
| avg. | 1.59        | 0.035   | 6.32                   | 0.001   |

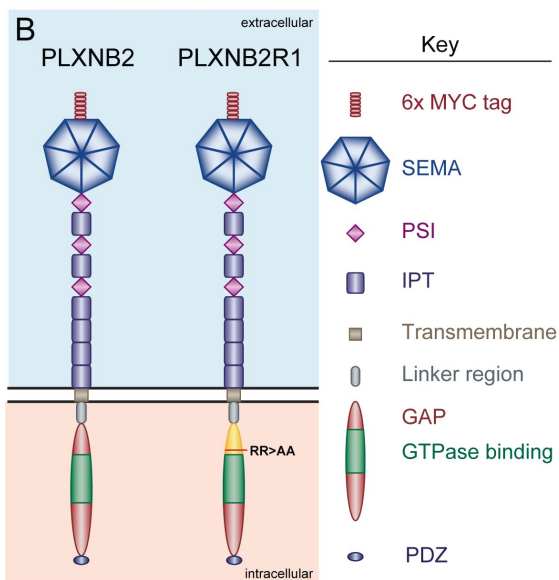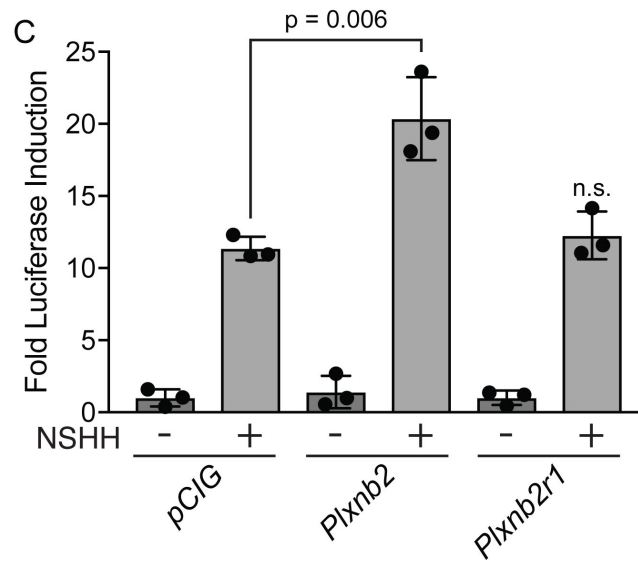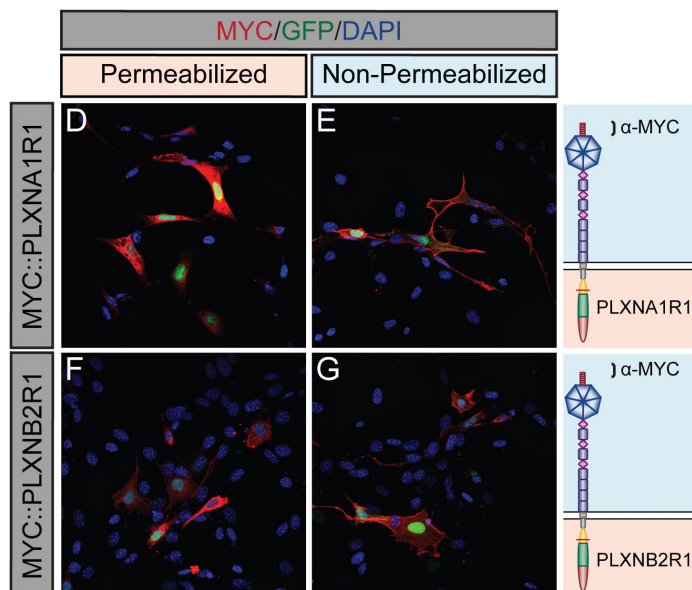

731 **Figure S2. Constitutively active PLXNA1 reproducibly increases HH pathway**  
732 **activity.** (A) Summary of luciferase assay data in which PLXNA1 and PLXNA1<sup>ΔECD</sup>  
733 were directly compared in five independent assays. Fold change reported between ligand-  
734 stimulated vector only (*pCIG*) triplicate wells and ligand-stimulated *Plxna1*- or  
735 *Plxna1*<sup>ΔECD</sup> - transfected triplicate wells. Yellow highlight denotes statistical significance  
736 ( $p < 0.05$ ). (B) Schematic of different PLXNB2 proteins. (C) HH-dependent luciferase  
737 reporter activity was measured in NIH/3T3 cells transfected with the indicated constructs  
738 and stimulated with control (-NSHH) or NSHH-conditioned media (+NSHH). Data are  
739 reported as mean fold induction  $\pm$  S.D. with p-values calculated using two-tailed  
740 Student's t tests. n.s. = not significant. (D-G) Antibody detection of MYC (red) in  
741 permeabilized (left panels) and non-permeabilized (right panels) NIH/3T3 cells to assess  
742 cell surface localization of the indicated MYC-tagged proteins. Nuclear GFP (green)  
743 indicates transfected cells, whereas DAPI (blue) stains all nuclei. Diagrams (right)  
744 describe each construct, with brackets indicating antibody binding sites. Scale bar =  
745 10 $\mu$ m.

746  
747 **Figure S2- Source Data 1**

748 Raw data for Figure S2C

Pinsky and Hoard et al., 2021, Figure S3

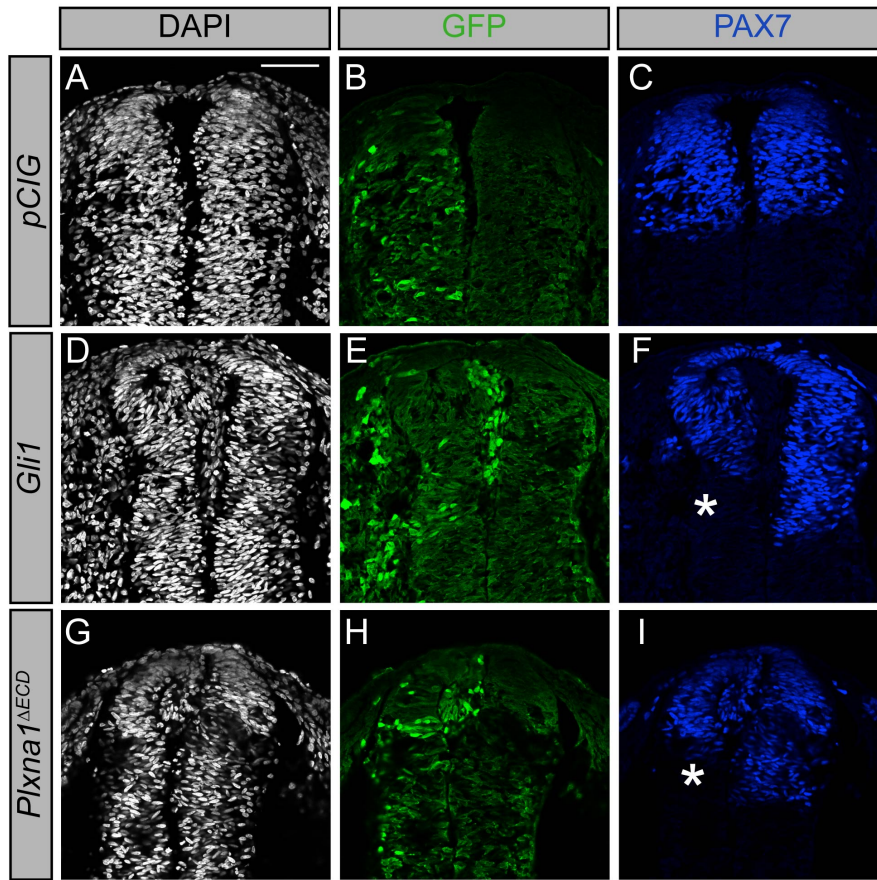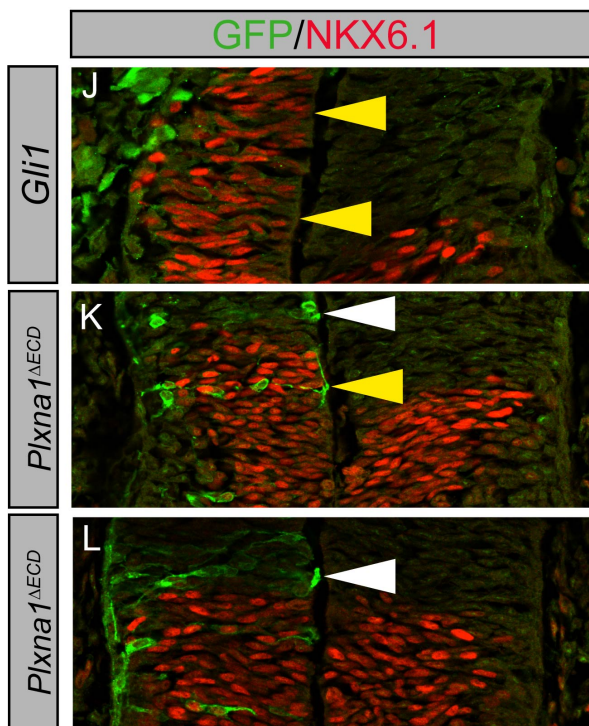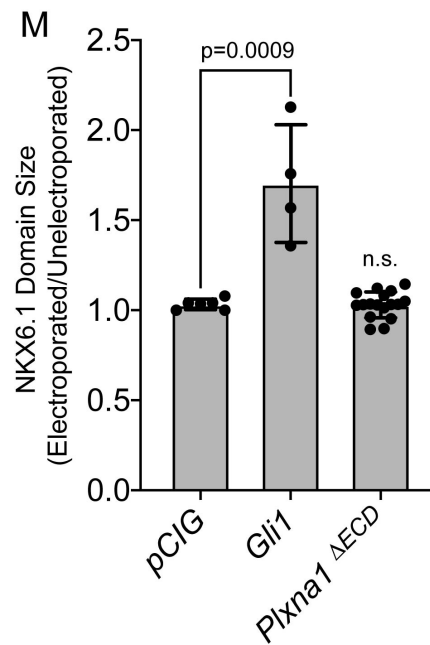



750 **Figure S3. Constitutively active PLXNA1 does not significantly alter Hedgehog-**  
751 **dependent neural tube patterning in the developing chicken embryo. (A-M)**  
752 Immunofluorescent analysis of neural patterning in forelimb level sections from  
753 Hamburger-Hamilton stage 21-22 chicken embryos. Embryos were electroporated at  
754 Hamburger-Hamilton stage 11-13 with *pCIG* (A-C), *Gli1* (D-F, J), or *Plxna1<sup>ΔECD</sup>* (G-I,  
755 K-L). Transverse sections were stained with antibodies directed against GFP (green),  
756 PAX7 (blue), and NKX6.1 (red). DAPI stain labels nuclei (gray). Electroporated cells are  
757 labeled with GFP. Asterisks denote the loss of PAX7. Scale bar = 50 μm. Yellow  
758 arrowheads indicate the presence of ectopic NKX6.1. White arrowheads (K-L) denote the  
759 absence of ectopic NKX6.1 in *Plxna1<sup>ΔECD</sup>*-electroporated embryos as compared to *Gli1*  
760 (J). Quantitation of NKX6.1 domain size normalizing electroporated and  
761 unelectroporated sides of developing chicken neural tubes electroporated with *pCIG*,  
762 *Gli1*, or *Plxna1<sup>ΔECD</sup>*. Values are reported as mean ± S.D. with p-values calculated using  
763 two-tailed Student's t-test.

764

765 **Figure S3- Source Data 1**

766 Raw data for Figure S3M

## 767 **References**

- 768 Ahn S, Joyner AL. 2005. In vivo analysis of quiescent adult neural stem cells responding  
769 to Sonic hedgehog. *Nature* **437**: 894-897.
- 770 Alcedo J, Ayzenzon M, Von Ohlen T, Noll M, Hooper JE. 1996. The Drosophila  
771 smoothed gene encodes a seven-pass membrane protein, a putative receptor for  
772 the hedgehog signal. *Cell* **86**: 221-232.
- 773 Allen BL, Song JY, Izzi L, Althaus IW, Kang JS, Charron F, Krauss RS, McMahon AP.  
774 2011. Overlapping roles and collective requirement for the coreceptors GAS1,  
775 CDO, and BOC in SHH pathway function. *Dev Cell* **20**: 775-787.
- 776 Allen BL, Tenzen T, McMahon AP. 2007. The Hedgehog-binding proteins Gas1 and Cdo  
777 cooperate to positively regulate Shh signaling during mouse development. *Genes  
778 Dev* **21**: 1244-1257.
- 779 Andreyeva T, Chaloupka FJ, Brownell KD. 2011. Estimating the potential of taxes on  
780 sugar-sweetened beverages to reduce consumption and generate revenue. *Prev  
781 Med* **52**: 413-416.
- 782 Bai CB, Auerbach W, Lee JS, Stephen D, Joyner AL. 2002. Gli2, but not Gli1, is  
783 required for initial Shh signaling and ectopic activation of the Shh pathway.  
784 *Development* **129**: 4753-4761.
- 785 Bandari S, Exner S, Ortmann C, Bachvarova V, Vortkamp A, Grobe K. 2015. Sweet on  
786 Hedgehogs: regulatory roles of heparan sulfate proteoglycans in Hedgehog-  
787 dependent cell proliferation and differentiation. *Curr Protein Pept Sci* **16**: 66-76.
- 788 Barberis D, Artigiani S, Casazza A, Corso S, Giordano S, Love CA, Jones EY, Comoglio  
789 PM, Tamagnone L. 2004. Plexin signaling hampers integrin-based adhesion,  
790 leading to Rho-kinase independent cell rounding, and inhibiting lamellipodia  
791 extension and cell motility. *Faseb J* **18**: 592-594.
- 792 Beachy PA, Hymowitz SG, Lazarus RA, Leahy DJ, Siebold C. 2010. Interactions  
793 between Hedgehog proteins and their binding partners come into view. *Genes Dev*  
794 **24**: 2001-2012.
- 795 Briscoe J, Therond PP. 2013. The mechanisms of Hedgehog signalling and its roles in  
796 development and disease. *Nat Rev Mol Cell Biol* **14**: 416-429.
- 797 Burke R, Nellen D, Bellotto M, Hafen E, Senti KA, Dickson BJ, Basler K. 1999.  
798 Dispatched, a novel sterol-sensing domain protein dedicated to the release of  
799 cholesterol-modified hedgehog from signaling cells. *Cell* **99**: 803-815.
- 800 Capurro MI, Xu P, Shi W, Li F, Jia A, Filmus J. 2008. Glypican-3 inhibits Hedgehog  
801 signaling during development by competing with patched for Hedgehog binding.  
802 *Dev Cell* **14**: 700-711.
- 803 Caspary T, Garcia-Garcia MJ, Huangfu D, Eggenschwiler JT, Wyler MR, Rakeman AS,  
804 Alcorn HL, Anderson KV. 2002. Mouse Dispatched homolog1 is required for  
805 long-range, but not juxtacrine, Hh signaling. *Curr Biol* **12**: 1628-1632.
- 806 Cayuso J, Marti E. 2005. Morphogens in motion: growth control of the neural tube. *J  
807 Neurobiol* **64**: 376-387.
- 808 Cayuso J, Ulloa F, Cox B, Briscoe J, Marti E. 2006. The Sonic hedgehog pathway  
809 independently controls the patterning, proliferation and survival of neuroepithelial  
810 cells by regulating Gli activity. *Development* **133**: 517-528.

- 811 Chang SC, Mulloy B, Magee AI, Couchman JR. 2011. Two distinct sites in sonic  
812 Hedgehog combine for heparan sulfate interactions and cell signaling functions. *J*  
813 *Biol Chem* **286**: 44391-44402.
- 814 Chen H, Chedotal A, He Z, Goodman CS, Tessier-Lavigne M. 1997. Neuropilin-2, a  
815 novel member of the neuropilin family, is a high affinity receptor for the  
816 semaphorins Sema E and Sema IV but not Sema III. *Neuron* **19**: 547-559.
- 817 Cheng HJ, Bagri A, Yaron A, Stein E, Pleasure SJ, Tessier-Lavigne M. 2001. Plexin-A3  
818 mediates semaphorin signaling and regulates the development of hippocampal  
819 axonal projections. *Neuron* **32**: 249-263.
- 820 Christ A, Christa A, Klippert J, Eule JC, Bachmann S, Wallace VA, Hammes A, Willnow  
821 TE. 2015. LRP2 Acts as SHH Clearance Receptor to Protect the Retinal Margin  
822 from Mitogenic Stimuli. *Dev Cell* **35**: 36-48.
- 823 Christ A, Christa A, Kur E, Lioubinski O, Bachmann S, Willnow TE, Hammes A. 2012.  
824 LRP2 is an auxiliary SHH receptor required to condition the forebrain ventral  
825 midline for inductive signals. *Dev Cell* **22**: 268-278.
- 826 Conrotto P, Corso S, Gamberini S, Comoglio PM, Giordano S. 2004. Interplay between  
827 scatter factor receptors and B plexins controls invasive growth. *Oncogene* **23**:  
828 5131-5137.
- 829 Consortium EP. 2012. An integrated encyclopedia of DNA elements in the human  
830 genome. *Nature* **489**: 57-74.
- 831 Corbit KC, Aanstad P, Singla V, Norman AR, Stainier DY, Reiter JF. 2005. Vertebrate  
832 Smoothed functions at the primary cilium. *Nature* **437**: 1018-1021.
- 833 Creanga A, Glenn TD, Mann RK, Saunders AM, Talbot WS, Beachy PA. 2012.  
834 Scube/You activity mediates release of dually lipid-modified Hedgehog signal in  
835 soluble form. *Genes Dev* **26**: 1312-1325.
- 836 Davis CA, Hitz BC, Sloan CA, Chan ET, Davidson JM, Gabdank I, Hilton JA, Jain K,  
837 Baymuradov UK, Narayanan AK et al. 2018. The Encyclopedia of DNA elements  
838 (ENCODE): data portal update. *Nucleic Acids Res* **46**: D794-D801.
- 839 Dessaud E, McMahon AP, Briscoe J. 2008. Pattern formation in the vertebrate neural  
840 tube: a sonic hedgehog morphogen-regulated transcriptional network.  
841 *Development* **135**: 2489-2503.
- 842 Duan Y, Wang SH, Song J, Mironova Y, Ming GL, Kolodkin AL, Giger RJ. 2014.  
843 Semaphorin 5A inhibits synaptogenesis in early postnatal- and adult-born  
844 hippocampal dentate granule cells. *Elife* **3**.
- 845 Engelke MF, Waas B, Kearns SE, Suber A, Boss A, Allen BL, Verhey KJ. 2019. Acute  
846 Inhibition of Heterotrimeric Kinesin-2 Function Reveals Mechanisms of  
847 Intraflagellar Transport in Mammalian Cilia. *Curr Biol* **29**: 1137-1148 e1134.
- 848 Fantin A, Schwarz Q, Davidson K, Normando EM, Denti L, Ruhrberg C. 2011. The  
849 cytoplasmic domain of neuropilin 1 is dispensable for angiogenesis, but promotes  
850 the spatial separation of retinal arteries and veins. *Development* **138**: 4185-4191.
- 851 Fard D, Tamagnone L. 2021. Semaphorins in health and disease. *Cytokine Growth Factor*  
852 *Rev* **57**: 55-63.
- 853 Ge X, Milenkovic L, Suyama K, Hartl T, Purzner T, Winans A, Meyer T, Scott MP.  
854 2015. Phosphodiesterase 4D acts downstream of Neuropilin to control Hedgehog  
855 signal transduction and the growth of medulloblastoma. *Elife* **4**.

- 856 Giordano S, Corso S, Conrotto P, Artigiani S, Gilestro G, Barberis D, Tamagnone L,  
857 Comoglio PM. 2002. The semaphorin 4D receptor controls invasive growth by  
858 coupling with Met. *Nat Cell Biol* **4**: 720-724.
- 859 Goetz SC, Anderson KV. 2010. The primary cilium: a signalling centre during vertebrate  
860 development. *Nat Rev Genet* **11**: 331-344.
- 861 Gu C, Yoshida Y, Livet J, Reimert DV, Mann F, Merte J, Henderson CE, Jessell TM,  
862 Kolodkin AL, Ginty DD. 2005. Semaphorin 3E and plexin-D1 control vascular  
863 pattern independently of neuropilins. *Science* **307**: 265-268.
- 864 Hamburger V, Hamilton HL. 1951. A series of normal stages in the development of the  
865 chick embryo. *J Morphol* **88**: 49-92.
- 866 Haycraft CJ, Banizs B, Aydin-Son Y, Zhang Q, Michaud EJ, Yoder BK. 2005. Gli2 and  
867 Gli3 localize to cilia and require the intraflagellar transport protein polaris for  
868 processing and function. *PLoS Genet* **1**: e53.
- 869 He Z, Tessier-Lavigne M. 1997. Neuropilin is a receptor for the axonal chemorepellent  
870 Semaphorin III. *Cell* **90**: 739-751.
- 871 Hillman RT, Feng BY, Ni J, Woo WM, Milenkovic L, Hayden Gephart MG, Teruel MN,  
872 Oro AE, Chen JK, Scott MP. 2011. Neuropilins are positive regulators of  
873 Hedgehog signal transduction. *Genes Dev* **25**: 2333-2346.
- 874 Hollway GE, Maule J, Gautier P, Evans TM, Keenan DG, Lohs C, Fischer D, Wicking C,  
875 Currie PD. 2006. Scube2 mediates Hedgehog signalling in the zebrafish embryo.  
876 *Dev Biol* **294**: 104-118.
- 877 Holtz AM, Griffiths SC, Davis SJ, Bishop B, Siebold C, Allen BL. 2015. Secreted  
878 HHIP1 interacts with heparan sulfate and regulates Hedgehog ligand localization  
879 and function. *J Cell Biol* **209**: 739-757.
- 880 Holtz AM, Peterson KA, Nishi Y, Morin S, Song JY, Charron F, McMahon AP, Allen  
881 BL. 2013. Essential role for ligand-dependent feedback antagonism of vertebrate  
882 hedgehog signaling by PTCH1, PTCH2 and HHIP1 during neural patterning.  
883 *Development* **140**: 3423-3434.
- 884 Hota PK, Buck M. 2012. Plexin structures are coming: opportunities for multilevel  
885 investigations of semaphorin guidance receptors, their cell signaling mechanisms,  
886 and functions. *Cell Mol Life Sci* **69**: 3765-3805.
- 887 Hui CC, Angers S. 2011. Gli proteins in development and disease. *Annu Rev Cell Dev*  
888 *Biol* **27**: 513-537.
- 889 Izzi L, Levesque M, Morin S, Laniel D, Wilkes BC, Mille F, Krauss RS, McMahon AP,  
890 Allen BL, Charron F. 2011. Boc and Gas1 each form distinct Shh receptor  
891 complexes with Ptch1 and are required for Shh-mediated cell proliferation. *Dev*  
892 *Cell* **20**: 788-801.
- 893 Janssen BJ, Robinson RA, Perez-Branguli F, Bell CH, Mitchell KJ, Siebold C, Jones EY.  
894 2010. Structural basis of semaphorin-plexin signalling. *Nature* **467**: 1118-1122.
- 895 Jeong J, McMahon AP. 2005. Growth and pattern of the mammalian neural tube are  
896 governed by partially overlapping feedback activities of the hedgehog antagonists  
897 patched 1 and Hhip1. *Development* **132**: 143-154.
- 898 Jongbloets BC, Pasterkamp RJ. 2014. Semaphorin signalling during development.  
899 *Development* **141**: 3292-3297.
- 900 Kawakami A, Nojima Y, Toyoda A, Takahoko M, Satoh M, Tanaka H, Wada H, Masai I,  
901 Terasaki H, Sakaki Y et al. 2005. The zebrafish-secreted matrix protein

- 902           you/scube2 is implicated in long-range regulation of hedgehog signaling. *Curr*  
903           *Biol* **15**: 480-488.
- 904 Kawakami T, Kawcak T, Li YJ, Zhang W, Hu Y, Chuang PT. 2002. Mouse dispatched  
905 mutants fail to distribute hedgehog proteins and are defective in hedgehog  
906 signaling. *Development* **129**: 5753-5765.
- 907 Kawasaki T, Kitsukawa T, Bekku Y, Matsuda Y, Sanbo M, Yagi T, Fujisawa H. 1999. A  
908 requirement for neuropilin-1 in embryonic vessel formation. *Development* **126**:  
909 4895-4902.
- 910 Kee HL, Dishinger JF, Blasius TL, Liu CJ, Margolis B, Verhey KJ. 2012. A size-  
911 exclusion permeability barrier and nucleoporins characterize a ciliary pore  
912 complex that regulates transport into cilia. *Nat Cell Biol* **14**: 431-437.
- 913 Kolodkin AL, Levengood DV, Rowe EG, Tai YT, Giger RJ, Ginty DD. 1997. Neuropilin  
914 is a semaphorin III receptor. *Cell* **90**: 753-762.
- 915 Koropouli E, Kolodkin AL. 2014. Semaphorins and the dynamic regulation of synapse  
916 assembly, refinement, and function. *Curr Opin Neurobiol* **27**: 1-7.
- 917 Lee CS, Buttitta L, Fan CM. 2001. Evidence that the WNT-inducible growth arrest-  
918 specific gene 1 encodes an antagonist of sonic hedgehog signaling in the somite.  
919 *Proc Natl Acad Sci U S A* **98**: 11347-11352.
- 920 Ma Y, Erkner A, Gong R, Yao S, Taipale J, Basler K, Beachy PA. 2002. Hedgehog-  
921 mediated patterning of the mammalian embryo requires transporter-like function  
922 of dispatched. *Cell* **111**: 63-75.
- 923 Machold R, Hayashi S, Rutlin M, Muzumdar MD, Nery S, Corbin JG, Gritli-Linde A,  
924 Dellovade T, Porter JA, Rubin LL et al. 2003. Sonic hedgehog is required for  
925 progenitor cell maintenance in telencephalic stem cell niches. *Neuron* **39**: 937-  
926 950.
- 927 Marigo V, Tabin CJ. 1996. Regulation of patched by sonic hedgehog in the developing  
928 neural tube. *Proc Natl Acad Sci U S A* **93**: 9346-9351.
- 929 Mauti O, Sadhu R, Gemayel J, Gesemann M, Stoeckli ET. 2006. Expression patterns of  
930 plexins and neuropilins are consistent with cooperative and separate functions  
931 during neural development. *BMC Dev Biol* **6**: 32.
- 932 Megason SG, McMahon AP. 2002. A mitogen gradient of dorsal midline Wnts organizes  
933 growth in the CNS. *Development* **129**: 2087-2098.
- 934 Muhl L, Folestad EB, Gladh H, Wang Y, Moessinger C, Jakobsson L, Eriksson U. 2017.  
935 Neuropilin 1 binds PDGF-D and is a co-receptor in PDGF-D-PDGFRbeta  
936 signaling. *J Cell Sci* **130**: 1365-1378.
- 937 Mukhopadhyay S, Wen X, Ratti N, Loktev A, Rangell L, Scales SJ, Jackson PK. 2013.  
938 The ciliary G-protein-coupled receptor Gpr161 negatively regulates the Sonic  
939 hedgehog pathway via cAMP signaling. *Cell* **152**: 210-223.
- 940 Neufeld G, Kessler O. 2008. The semaphorins: versatile regulators of tumour progression  
941 and tumour angiogenesis. *Nat Rev Cancer* **8**: 632-645.
- 942 Neufeld G, Mumblat Y, Smolkin T, Toledano S, Nir-Zvi I, Ziv K, Kessler O. 2016. The  
943 semaphorins and their receptors as modulators of tumor progression. *Drug Resist*  
944 *Updat* **29**: 1-12.
- 945 Nogi T, Yasui N, Mihara E, Matsunaga Y, Noda M, Yamashita N, Toyofuku T,  
946 Uchiyama S, Goshima Y, Kumanogoh A et al. 2010. Structural basis for  
947 semaphorin signalling through the plexin receptor. *Nature* **467**: 1123-1127.

- 948 Nybakken K, Vokes SA, Lin TY, McMahon AP, Perrimon N. 2005. A genome-wide  
949 RNA interference screen in *Drosophila melanogaster* cells for new components of  
950 the Hh signaling pathway. *Nat Genet* **37**: 1323-1332.
- 951 Ocbina PJ, Eggenschwiler JT, Moskowitz I, Anderson KV. 2011. Complex interactions  
952 between genes controlling trafficking in primary cilia. *Nat Genet* **43**: 547-553.
- 953 Perala N, Sariola H, Immonen T. 2012. More than nervous: the emerging roles of plexins.  
954 *Differentiation* **83**: 77-91.
- 955 Perala NM, Immonen T, Sariola H. 2005. The expression of plexins during mouse  
956 embryogenesis. *Gene Expr Patterns* **5**: 355-362.
- 957 Petrova R, Joyner AL. 2014. Roles for Hedgehog signaling in adult organ homeostasis  
958 and repair. *Development* **141**: 3445-3457.
- 959 Pinsky JM, Franks NE, McMellen AN, Giger RJ, Allen BL. 2017. Neuropilin-1  
960 promotes Hedgehog signaling through a novel cytoplasmic motif. *J Biol Chem*  
961 **292**: 15192-15204.
- 962 Prud'homme GJ, Glinka Y. 2012. Neuropilins are multifunctional coreceptors involved in  
963 tumor initiation, growth, metastasis and immunity. *Oncotarget* **3**: 921-939.
- 964 Puschel AW. 2007. GTPases in semaphorin signaling. *Adv Exp Med Biol* **600**: 12-23.
- 965 Rich SK, Baskar R, Terman JR. 2021. Propagation of F-actin disassembly via Myosin15-  
966 Mical interactions. *Sci Adv* **7**.
- 967 Rohatgi R, Milenkovic L, Scott MP. 2007. Patched1 regulates hedgehog signaling at the  
968 primary cilium. *Science* **317**: 372-376.
- 969 Rohm B, Ottmeyer A, Lohrum M, Puschel AW. 2000a. Plexin/neuropilin complexes  
970 mediate repulsion by the axonal guidance signal semaphorin 3A. *Mech Dev* **93**:  
971 95-104.
- 972 Rohm B, Rahim B, Kleiber B, Hovatta I, Puschel AW. 2000b. The semaphorin 3A  
973 receptor may directly regulate the activity of small GTPases. *FEBS Lett* **486**: 68-  
974 72.
- 975 Roth L, Nasarre C, Dirrig-Grosch S, Aunis D, Cremel G, Hubert P, Bagnard D. 2008.  
976 Transmembrane domain interactions control biological functions of neuropilin-1.  
977 *Mol Biol Cell* **19**: 646-654.
- 978 Sarabipour S, Mac Gabhann F. 2021. Targeting neuropilins as a viable SARS-CoV-2  
979 treatment. *FEBS J*.
- 980 Stone DM, Hynes M, Armanini M, Swanson TA, Gu Q, Johnson RL, Scott MP, Pennica  
981 D, Goddard A, Phillips H et al. 1996. The tumour-suppressor gene patched  
982 encodes a candidate receptor for Sonic hedgehog. *Nature* **384**: 129-134.
- 983 Suto F, Tsuboi M, Kamiya H, Mizuno H, Kiyama Y, Komai S, Shimizu M, Sanbo M,  
984 Yagi T, Hiromi Y et al. 2007. Interactions between plexin-A2, plexin-A4, and  
985 semaphorin 6A control lamina-restricted projection of hippocampal mossy fibers.  
986 *Neuron* **53**: 535-547.
- 987 Takahashi T, Fournier A, Nakamura F, Wang LH, Murakami Y, Kalb RG, Fujisawa H,  
988 Strittmatter SM. 1999. Plexin-neuropilin-1 complexes form functional  
989 semaphorin-3A receptors. *Cell* **99**: 59-69.
- 990 Takahashi T, Strittmatter SM. 2001. Plexin1 autoinhibition by the plexin sema domain.  
991 *Neuron* **29**: 429-439.
- 992 Tamagnone L, Artigiani S, Chen H, He Z, Ming GI, Song H, Chedotal A, Winberg ML,  
993 Goodman CS, Poo M et al. 1999. Plexins are a large family of receptors for

- 994 transmembrane, secreted, and GPI-anchored semaphorins in vertebrates. *Cell* **99**:  
995 71-80.
- 996 Teglund S, Toftgard R. 2010. Hedgehog beyond medulloblastoma and basal cell  
997 carcinoma. *Biochim Biophys Acta* **1805**: 181-208.
- 998 Tenzen T, Allen BL, Cole F, Kang JS, Krauss RS, McMahon AP. 2006. The cell surface  
999 membrane proteins Cdo and Boc are components and targets of the Hedgehog  
1000 signaling pathway and feedback network in mice. *Dev Cell* **10**: 647-656.
- 1001 Todaro GJ, Green H. 1963. Quantitative studies of the growth of mouse embryo cells in  
1002 culture and their development into established lines. *J Cell Biol* **17**: 299-313.
- 1003 Toyofuku T, Zhang H, Kumanogoh A, Takegahara N, Suto F, Kamei J, Aoki K, Yabuki  
1004 M, Hori M, Fujisawa H et al. 2004. Dual roles of Sema6D in cardiac  
1005 morphogenesis through region-specific association of its receptor, Plexin-A1,  
1006 with off-track and vascular endothelial growth factor receptor type 2. *Genes Dev*  
1007 **18**: 435-447.
- 1008 Tukachinsky H, Kuzmickas RP, Jao CY, Liu J, Salic A. 2012. Dispatched and scube  
1009 mediate the efficient secretion of the cholesterol-modified hedgehog ligand. *Cell*  
1010 *Rep* **2**: 308-320.
- 1011 van den Heuvel M, Ingham PW. 1996. smoothened encodes a receptor-like serpentine  
1012 protein required for hedgehog signalling. *Nature* **382**: 547-551.
- 1013 Vyas N, Goswami D, Manonmani A, Sharma P, Ranganath HA, VijayRaghavan K,  
1014 Shashidhara LS, Sowdhamini R, Mayor S. 2008. Nanoscale organization of  
1015 hedgehog is essential for long-range signaling. *Cell* **133**: 1214-1227.
- 1016 Wang Y, He H, Srivastava N, Vikarunnessa S, Chen YB, Jiang J, Cowan CW, Zhang X.  
1017 2012. Plexins are GTPase-activating proteins for Rap and are activated by  
1018 induced dimerization. *Sci Signal* **5**: ra6.
- 1019 Wang Y, Pascoe HG, Brautigam CA, He H, Zhang X. 2013. Structural basis for  
1020 activation and non-canonical catalysis of the Rap GTPase activating protein  
1021 domain of plexin. *Elife* **2**: e01279.
- 1022 Whalen DM, Malinauskas T, Gilbert RJ, Siebold C. 2013. Structural insights into  
1023 proteoglycan-shaped Hedgehog signaling. *Proc Natl Acad Sci U S A* **110**: 16420-  
1024 16425.
- 1025 Winberg ML, Tamagnone L, Bai J, Comoglio PM, Montell D, Goodman CS. 2001. The  
1026 transmembrane protein Off-track associates with Plexins and functions  
1027 downstream of Semaphorin signaling during axon guidance. *Neuron* **32**: 53-62.
- 1028 Wong SY, Seol AD, So PL, Ermilov AN, Bichakjian CK, Epstein EH, Jr., Dlugosz AA,  
1029 Reiter JF. 2009. Primary cilia can both mediate and suppress Hedgehog pathway-  
1030 dependent tumorigenesis. *Nat Med* **15**: 1055-1061.
- 1031 Woods IG, Talbot WS. 2005. The you gene encodes an EGF-CUB protein essential for  
1032 Hedgehog signaling in zebrafish. *PLoS Biol* **3**: e66.
- 1033 Yan D, Lin X. 2008. Opposing roles for glypicans in Hedgehog signalling. *Nat Cell Biol*  
1034 **10**: 761-763.
- 1035 Yang T, Terman JR. 2013. Regulating small G protein signaling to coordinate axon  
1036 adhesion and repulsion. *Small GTPases* **4**: 34-41.
- 1037 Yazdani U, Terman JR. 2006. The semaphorins. *Genome Biol* **7**: 211.

- 1038 Yoshida Y, Han B, Mendelsohn M, Jessell TM. 2006. PlexinA1 signaling directs the  
1039 segregation of proprioceptive sensory axons in the developing spinal cord.  
1040 *Neuron* **52**: 775-788.
- 1041 Zhang XM, Ramalho-Santos M, McMahon AP. 2001. Smoothed mutants reveal  
1042 redundant roles for Shh and Ihh signaling including regulation of L/R asymmetry  
1043 by the mouse node. *Cell* **105**: 781-792.
- 1044 Zhao XF, Kohen R, Parent R, Duan Y, Fisher GL, Korn MJ, Ji L, Wan G, Jin J, Puschel  
1045 AW et al. 2018. PlexinA2 Forward Signaling through Rap1 GTPases Regulates  
1046 Dentate Gyrus Development and Schizophrenia-like Behaviors. *Cell Rep* **22**: 456-  
1047 470.
- 1048
